# Supplementary material for: Transgene regulation in plants by alternative splicing of a suicide exon
Source: PubMed Central journal article supplement — Nucleic Acids Res. 2012 Feb 6;40(10):4701–10. doi: 10.1093/nar/gks032 (PMC3378873; doi:10.1093/nar/gks032), 2012-02-06
Supplement: supp_gks032_SUPPLEMENTARY_MATERIAL_compiled_NAR_revised2.pdf [file supp_gks032_SUPPLEMENTARY_MATERIAL_compiled_NAR_revised2.pdf]

# SUPPLEMENTARY MATERIAL

## Transgene regulation in plants by alternative splicing of a suicide exon

Scott F. Hickey, Malathy Sridhar, Alexander J. Westermann, Qian Qin, Pooja Vijayendra, Geoffrey Liou, and Ming C. Hammond

### Table of Contents

**Figure S1.** P5SM<sub>E/R</sub> functions in additional *Arabidopsis* gene contexts

**Figure S2.** Additional bordering codon mutations tested within TFIIIA-eGFP

**Figure S3.** Secondary structures and sequences of *At*P5SM, *Os*P5SM, and *Hy*P5SM

**Figure S4.** Leaf autofluorescence and DsRed2 expression contributes to background fluorescence.

**Figure S5.** Expression of eGFP-*Hy*P5SM analyzed by western blot.

### Supplementary Methods for western blot

**Figure S6.** Construct and spliced product sequence maps

TFIIIA-eGFP

eGFP-P5SM<sub>E/R</sub>

eGFP-*Hy*P5SM<sub>E/R</sub>

eGFP-*Os*P5SM<sub>E/R</sub>

LUC-P5SM<sub>E/R</sub>

LUC-P5SM<sub>K/R</sub>

CYP707A3-P5SM<sub>E/S</sub>

CYP707A3-P5SM<sub>K/R</sub>

PSY-P5SM<sub>C/R</sub>

PSY-P5SM<sub>E/R</sub>

NCED3-P5SM<sub>E/R</sub>

CYP707A2-P5SM<sub>E/R</sub>

CYP707A3-P5SM<sub>E/R</sub>

**Supplementary Table 1.** Sequences of DNA primers

## SUPPLEMENTARY FIGURES

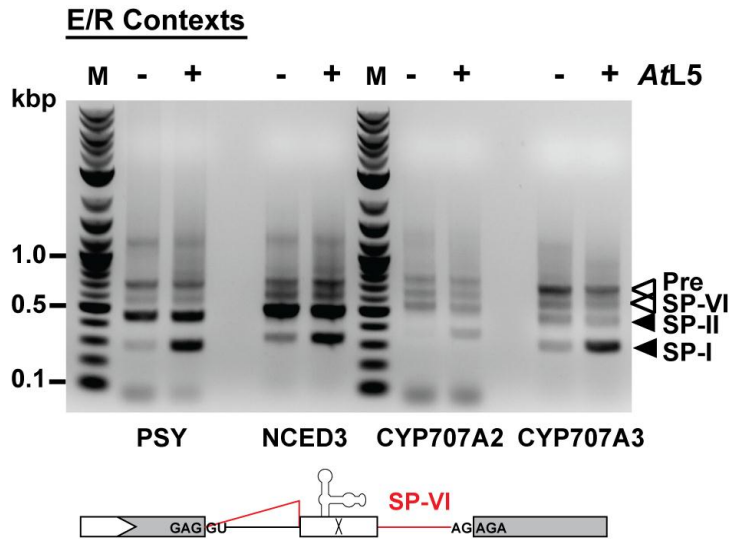

**Figure S1. P5SM<sub>E/R</sub> functions in additional *Arabidopsis* gene contexts.** Spliced products detected by RT-PCR for phytoene synthase (PSY), 9-*cis*-epoxycarotenoid dioxygenase (NCED3), and abscissic acid 8'-hydroxylase (CYP707A2 and CYP707A3) harboring the P5SM cassette inserted within the E/R sequence context, upon induction with AtL5 (+) or LUC as a control (-). In addition to SP-I and SP-II, partially spliced (SP-VI) and unspliced pre-mRNA (Pre) were detected for these constructs. A schematic representation of SP-VI is shown. All sequences are shown in Supplementary Materials.

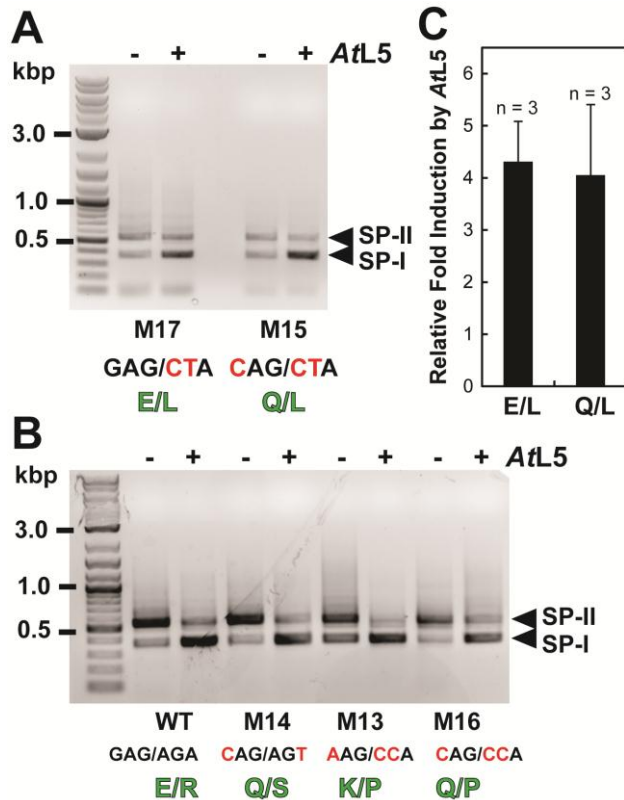

**Figure S2. Additional bordering codon mutations tested within TFIIIA-eGFP. (A, B)** Spliced products detected by RT-PCR for additional TFIIIA-P5SM<sub>E/R</sub> mutants, which were characterized as fully functional. Red nucleotides indicate the mutations made to the bordering codons, and the two amino acids encoded by the 5' and 3' codons are indicated. **(C)** Fold induction of protein expression determined by eGFP fluorescence for M17 and M15. Induction with *AtL5* was measured in comparison to induction with LUC as a control.

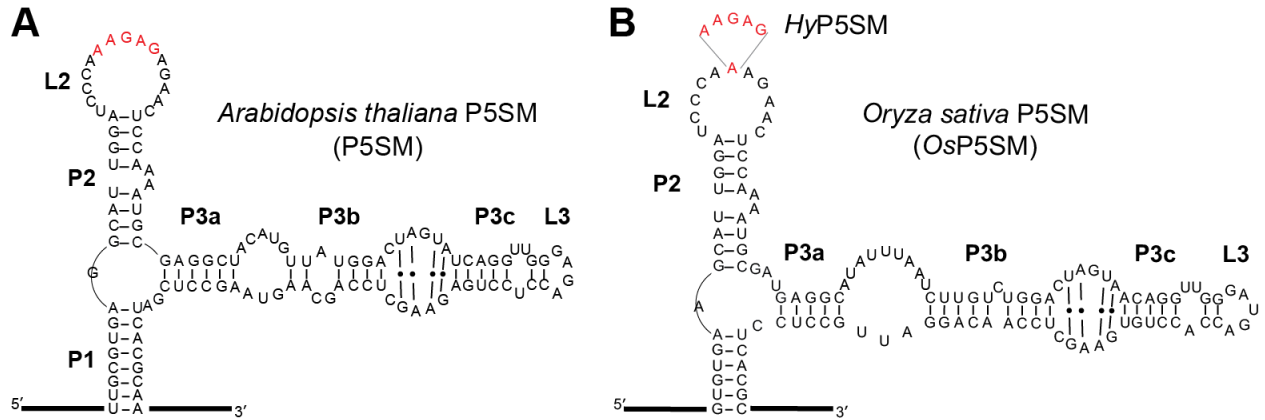

**Figure S3. Secondary structures and sequences of *AtP5SM*, *OsP5SM*, and *HyP5SM*.** Secondary structures and sequences of the (A) *Arabidopsis thaliana* P5SM RNA element and (B) *Oryza sativa* P5SM (Os02G0116000) RNA element. Red nucleotides represent sequence differences in the L2 loop, the putative binding site of an exon-defining splice factor. *HyP5SM* was constructed by replacing the L2 loop from *OsP5SM* with the L2 loop from *AtP5SM* by overlap extension PCR.

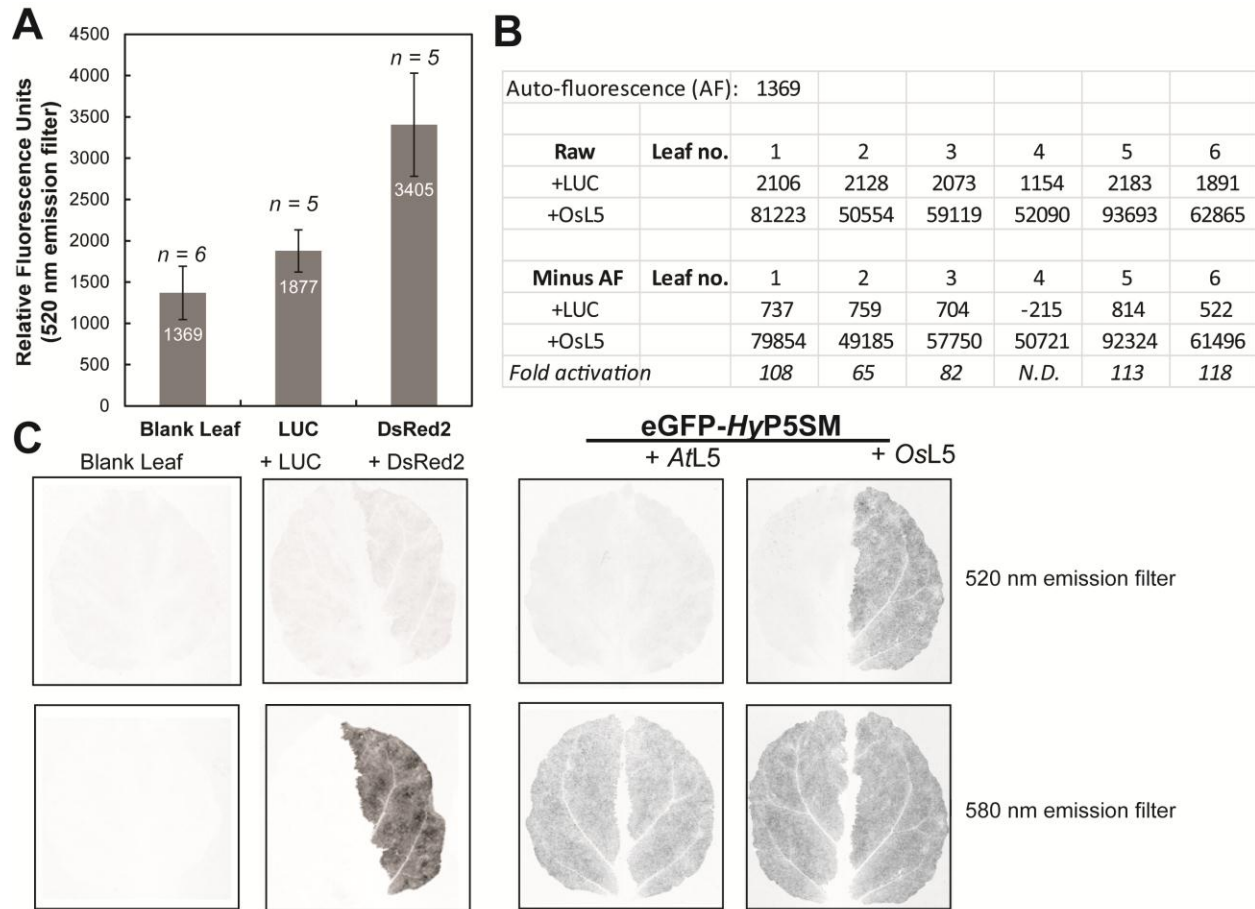

**Figure S4. Leaf autofluorescence and DsRed2 expression contributes to background fluorescence.** (A) Fluorescence of blank (autofluorescence), LUC (control), or DsRed2 (normalization standard) measured at the wavelength used to detect eGFP fluorescence (520 nm). (B) Raw fluorescence data for leaf samples co-expressing LUC as a control or OsL5 were corrected for the average background autofluorescence measured from blank leaf samples. The subtracted values were graphed in Fig. 4B. (C) Representative whole leaf scans for blank, LUC, or DsRed2 only. Also, representative whole leaf scans for the eGFP reporter harboring the *HyP5SM* cassette co-expressing *AtL5*, *OsL5*, or LUC as a control. Matching fluorescence scans at wavelengths for detecting eGFP (520 nm) and DsRed2 (580 nm) are shown.

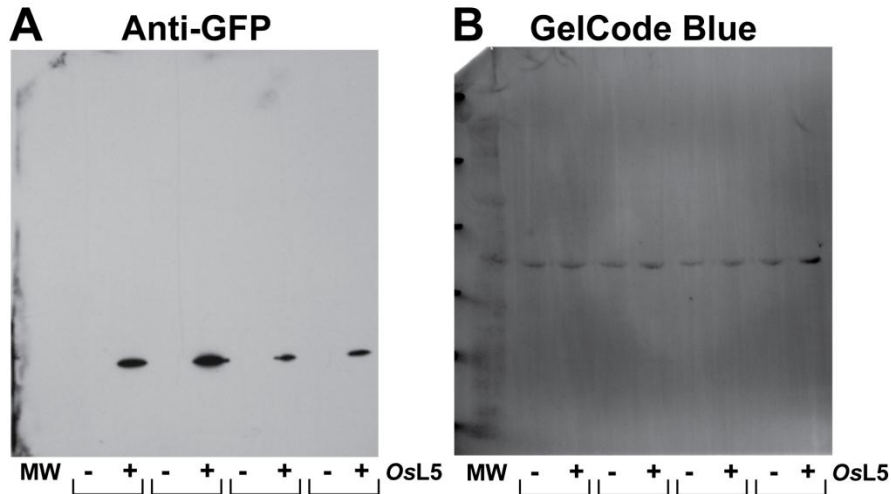

**Figure S5. Expression of eGFP-*HyP5SM* analyzed by western blot.** (A) Immunoblot analysis of GFP expression for four different replicate sets of crude protein extracts from *N. benthamiana* leaf halves infiltrated with the reporter construct, eGFP-*HyP5SM*, inducer (OsL5) or control (LUC), and DsRed2 as a normalization standard, as described for the leaf-based fluorescence assay. (B) Gelcode Blue staining of the blot shown in A, which visualizes all proteins present on the blot. The major band in the leaf extracts corresponds to Rubisco.

**Supplementary Methods for western blot.** Crude protein was extracted from ~100 mg *N. benthamiana* leaf tissue collected 2 days post infiltration as previously described (23). After centrifugation, the total protein concentration of the supernatant was determined using the Coomassie Plus Protein Assay (Pierce) following standard protocols. ~2  $\mu$ g of total protein for each sample was loaded and run on an SDS-PAGE gel along with a pre-stained molecular weight marker. Semi-dry transfer to the PVDF membrane (Millipore) was performed following standard procedures using an Owl HEP-1 electroblotter. After overnight incubation with SuperBlock blocking buffer (Pierce) with 1% Tween-20, the membrane was probed with 1:20,000 anti-GFP (Millipore) in SuperBlock for 1 hr. Following three washes with TBST (TBS with 0.1% Tween-20), the membrane was incubated with 1:10,000 goat anti-mouse HRP conjugate (Pierce) in SuperBlock for 1 hr. After three more washes with TBST, protein was detected using the SuperSignal West Pico chemiluminescent substrate (Pierce) following standard procedures. Shown is the film image after a 20 min exposure. The membrane was subsequently incubated with GelCode Blue reagent (Pierce) for 5 min before destaining following standard procedures.

## Figure S6. Construct and spliced product sequence maps

LEGEND: UTR, TFIIIA coding sequence, coding sequence, suicide exon sequence, stop codon, splice site, restriction site, NNN bordering codons, NNN nucleotides not sequenced, NNN aligned with primers used for spliced product analysis

### TFIIIA-eGFP gene sequence (AT1G72050)

```
1  GTGCGGCGTC TTGATGGAGG AGATAAACCC TAGTTCTTCT GTAGACAATA
51  AGAGAGACAT GCGGAAGAA GCTAAAGTTG ATGTGAAGAC TTCGGCGAAG
101 AAGGATATAC GCAATTATCT ATGCCAGTAT TCGGAATCA GCAGATCTAA
151 AAACATATCTC ATCACTAAAC ACATCCAATC TCATCATCAG GTTTGAGATC
201 TTCCTCCAAT TCGATTCCAA TTTCTCATCC GTGGCATCTT GATTTGTTTT
251 CAATGAAATT GAGAGTTGAG TCTGTAGAAT CGGCGATGGT TTGTTGAATT
301 GAGAGTTTCT ATGATTCGTT TGTTTACATG GAACTTGAAG AGGAAAGAGA
351 TGATGAAGCT TGTGAGGTTG ATGAGGAGTC TTCAAGTAAT CATACTTGTC
401 AAGAATGTGG TGCTGAGTTT AAGAAACCTG CTCACTTGAA GCAGCATATG
451 CAGAGTCATT CGCTCAGGT AGATTTATGC ATCCTCTTGT CATGAGAAGT
501 CGAATTGTTT CCATTCTGTG TGTTGCAGCT ACAGATGGAG ATACATAGAG
551 ATACTCGTGG ATTTTGCTTA GTGTTGAGTT TTGTTCTGGT TGTGAACTAA
601 AAGTTTATAC ATTTGCAGGA AATAAATAGC CTTTGTGTTA AATCAAAGG
651 TCTTACCTAT GTTATTGCGT GAGGCATTGG ATCCCAAAGA GAGAACTCCA
701 AAATGCGAGG CTACATGTTA TGGACTAGTA TCAGGTTGGG AGACCTCCTG
751 AGAAGCTCCA GCAAGTAAGC CTCGATCAGC CAAAATGTTT GAGGTCGTGAT
801 GTTCAATAGC TTGTTTTGTT TCACTTTGCT TTGGACTTTC TTTTCGCCAA
851 TGAGCTATGT TTCTGATGGT TTTCACTCTT TTGGTGTGTA GAGATCTTTT
901 ACTTGCTATG TGGATtctag aGTGAGCAAG GCGGAGGAGC TGTTACCCGG
951 GGTGGTGCCC ATCCTGGTCG AGCTGGACGG CGACGTAAAC GGCCACAAGT
1001 TCAGCGTGTC CGGCGAGGGC GAGGGCGATG CCACCTACGG CAAGCTGACC
1051 CTGAAGTTCA TCTGCACCAC CGGCAAGCTG CCCGTGCCCT GGCCACCCT
1101 CGTGACCACC CTGACCTACG GCGTGCAGTG CTTAGCCGC TACCCCGACC
1151 ACATGAAGCA GCACGACTTC TTCAAGTCCG CCATGCCCGA AGGCTACGTC
1201 CAGGAGCGCA CCATCTTCTT CAAGGACGAC GGCAACTACA AGACCCGCGC
1251 CGAGGTGAAG TTCGAGGGCG ACACCCTGGT GAACCGCATC GAGCTGAAGG
1301 GCATCGACTT CAAGGAGGAC GGCAACATCC TGGGGCACA GCTGGAGTAC
1351 AACTACAACA GCCACAACGT CTATATCATG GCCGACAAGC AGAAGAACGG
1401 CATCAAGGTG AACTTCAAGA TCCGCCACAA CATCGAGGAC GGCAGCGTGC
1451 AGCTCGCCGA CCACTACCAG CAGAACACCC CCATCGGCGA CGGCCCGTG
1501 CTGCTGCCCG ACAACCACTA CCTGAGCACC CAGTCCGCC TGAGCAAAGA
1551 CCCAACGAG AAGCGCGATC ACATGGTCCT GCTGGAGTTC GTGACCCCG
1601 CCGGGATCAC TCTCGGCATG GACGAGCTGT ACAAGtaagt cgac
```

### TFIIIA-eGFP SPLICED PRODUCT I

```
1 GTGCGGCGTC TTGATGGAGG AGATAAACCC TAGTTCTTCT GTAGACAATA
51 AGAGAGACAT GCGGAAGAA GCTAAAGTTG ATGTGAAGAC TTCGGCGAAG
101 AAGGATATAC GCAATTATCT ATGCCAGTAT TCGGAATCA GCAGATCTAA
151 AAACATCTC ATCACTAAAC ACATCCAATC TCATCATCAG ATGGAACTTG
201 AAGAGGAAAG AGATGATGAA GCTTGTGAGG TTGATGAGGA GTCTTCAAGT
251 AATCATACTT GTCAAGAATG TGGTGCTGAG TTTAAGAAAC CTGCTCACTT
301 GAAGCAGCAT ATGCAGAGTC ATTCGCTCGA GAGATCTTTT ACTTGCTATG
351 TGGATtctag aGTGAGCAAG GCGGAGGAGC TG TTCACCGG GGTGGTGCCC
```

### TFIIIA-eGFP SPLICED PRODUCT II

```
1 GTGCGGCGTC TTGATGGAGG AGATAAACCC TAGTTCTTCT GTAGACAATA
51 AGAGAGACAT GCGGAAGAA GCTAAAGTTG ATGTGAAGAC TTCGGCGAAG
101 AAGGATATAC GCAATTATCT ATGCCAGTAT TCGGAATCA GCAGATCTAA
151 AAACATCTC ATCACTAAAC ACATCCAATC TCATCATCAG ATGGAACTTG
201 AAGAGGAAAG AGATGATGAA GCTTGTGAGG TTGATGAGGA GTCTTCAAGT
251 AATCATACTT GTCAAGAATG TGGTGCTGAG TTTAAGAAAC CTGCTCACTT
301 GAAGCAGCAT ATGCAGAGTC ATTCGCTCGA GGAAATAAAT AGCCTTTTGT
351 TTAAATCAAA AGGTCTTACC TATGTTATTG CGTGA GGCAT TGGATCCCAA
401 AGAGAGAACT CCAAATGCG AGGCTACATG TTATGGACTA GTATCAGGTT
451 GGGAGACCTC CTGAGAAGCT CCAGCAAGTA AGCCTCGATC ACGCAAATG
501 TTTGAGAGAT CTTTTACTTG CTATGTGGAT tctagaGTGA GCAAGGGCGA
```

### TFIIIA-eGFP SPLICED PRODUCT III

```
1 GUGCGGCGUC UUGAUGGAGG AGAUA AACCC UAGUUCUUCU GUAGACAAUA
51 AGAGAGACAU GCGGAAGAA GCUAAAGUUG AUGUGAAGAC UUCGGCGAAG
101 AAGGAUAUAC GCAAUAUUCU AUGCCAGUAU UGCGGAAUCA GCAGAUCAA
151 AAACUAUCUC AUCACUAAAC ACAUCCAUC UCAUCAUCAG AGAUUUUA
201 CUUGCUAUGU GGAUucuaga GUGAGCAAGG GCGAGGAGCU GUUCACCGGG
```

### TFIIIA-eGFP SPLICED PRODUCT IV

```
1 GTGCGGCGTC TTGATGGAGG AGATAAACCC TAGTTCTTCT GTAGACAATA
51 AGAGAGACAT GCGGAAGAA GCTAAAGTTG ATGTGAAGAC TTCGGCGAAG
101 AAGGATATAC GCAATTATCT ATGCCAGTAT TCGGAATCA GCAGATCTAA
151 AAACATCTC ATCACTAAAC ACATCCAATC TCATCATCAG ATGGAACTTG
201 AAGAGGAAAG AGATGATGAA GCTTGTGAGG TTGATGAGGA GTCTTCAAGT
251 AATCATACTT GTCAAGAATG TGGTGCTGAG TTTAAGAAAC CTGCTCACTT
301 GAAGCAGCAT ATGCAGAGTC ATTCGCTCGA GGTAGATTTA TGCATCCTCT
351 TGTCATGAGA AGTCGAATTG TTCCATTCT GTGTGTTGCA GCTACAGATG
401 GAGATACATA GAGATACTCG TGGATTTTGC TTAGTGTGTA GTTTTGTTCT
```



451 GGTGTGAAC TAAAAGTTTA TACATTTGCA GAAATAAAT AGCCTTTTGT  
 501 TTAAATCAAA AGGTCTTACC TATGTTATTG CGTGAAGGCAT TGGATCCCAA  
 551 AGAGAGAACT CCAAATGCG AGGCTACATG TTATGGACTA GTATCAGGTT  
 601 GGGAGACCTC CTGAGAAGCT CCAGCAAGTA AGCCTCGATC ACGCAAATG  
 651 TTTGAGAGAT CTTTACTTGG CTATGTGGAT tctagaGTGA GCAAGGGCGA

## TFIIIA-eGFP SPLICED PRODUCT V

1 GTGCGGCGTC TTGATGGAGG AGATAAACCC TAGTTCTTCT GTAGACAATA  
 51 AGAGAGACAT GCGGAAGAA GCTAAAGTTG ATGTGAAGAC TTCGGCGAAG  
 101 AAGGATATAC GCAATTATCT ATGCCAGTAT TCGGAATCA GCAGATCTAA  
 151 AAACATATCTC ATCACTAAAC ACATCCAATC TCATCATCAG GAAATAAATA  
 201 GCCTTTTGT TAAATCAAAA GGTCTTACCT ATGTTATTGC GTGAAGGCATT  
 251 GGATCCCAA GAGAGAACTC CAAATGCGA GGCTACATGT TATGGACTAG  
 301 TATCAGGTTG GGAGACCTCC TGAGAAGCTC CAGCAAGTAA GCCTCGATCA  
 351 CGCAAATGT TTGAGAGATC TTTTACTTGC TATGTGGATt ctagaGTGAG

## eGFP-P5SM<sub>E/R</sub> gene sequence

1 ATGTCTAGAG TGAGCAAGGG CGAGGAGCTG TTCACCGGGG TGGTGCCCAT  
 51 CCTGGTCGAG CTGGACGGCG ACGTAAACGG CCACAAGTTC AGCGTGTCCG  
 101 GCGAGGGCGA GGGCGATGCC ACCTACGGCA AGCTGACCCT GAAGTTCATC  
 151 TGCACCACCG GCAAGCTGCC CGTGCCCTGG CCCACCCTCG TGACCACCCT  
 201 GACCTACGGC GTGCAGTGCT TCAGCCGCTA CCCCACCAC ATGAAGCAGC  
 251 ACGACTTCTT CAAGTCCGCC ATGCCCGAAG GCTACGTCCA GGAGGTAGAT  
 301 TTATGCATCC TCTTGTCATG AGAAGTCGAA TTGTTCCCAT TCTGTGTGTT  
 351 GCAGCTACAG ATGGAGATAC ATAGAGATAC TCGTGGATTT TGCTTAGTGT  
 401 TGAGTTTTGT TCTGGTTGTG AACTAAAAGT TTATACATTT GCAGGAAATA  
 451 AATAGCCTTT TGTTTAAATC AAAAGGTCTT ACCTATGTTA TTGCGTGAAGG  
 501 CATTGGATCC CAAAGAGAGA ACTCCAAAT GCGAGGCTAC ATGTTATGGA  
 551 CTAGTATCAG GTTGGGAGAC CTCCTGAGAA GCTCCAGCAA GTAAGCCTCG  
 601 ATCACGCAA ATGTTTGAGG TCTGATGTTT AATAGCTTGT TTTGTTTCAC  
 651 TTTGCTTTGG ACTTCTTTT CGCCAATGAG CTATGTTTCT GATGGTTTTT  
 701 ACTCTTTTGG TGTGTAGAGA ACCATCTTCT TCAAGGACGA CGGCAACTAC  
 751 AAGACCGCG CCGAGGTGAA GTTCGAGGGC GACACCCTGG TGAACCGCAT  
 801 CGAGCTGAAG GGCATCGACT TCAAGGAGGA CGGCAACATC CTGGGGCACA  
 851 AGCTGGAGTA CAACTACAAC AGCCACAACG TCTATATCAT GGCCGACAAG  
 901 CAGAAGAACG GCATCAAGGT GAACTTCAAG ATCCGCCACA ACATCGAGGA  
 951 CGGCAGCGTG CAGCTCGCCG ACCACTACCA GCAGAACC ACCATCGGCC  
 1001 ACGGCCCGT GCTGCTGCC GACAACCACT ACCTGAGCAC CCAGTCCGCC  
 1051 CTGAGCAAAG ACCCAACGA GAAGCGCGAT CACATGGTCC TGCTGGAGTT  
 1101 CGTGACCGCC GCCGGATCA CTCTCGGCAT GGACGAGCTG TACAAGTAA

## eGFP-P5SM<sub>E/R</sub> SPLICED PRODUCT I

```
1 CACCCTGACC TACGGCGTGC AGTGCTTCAG CCGCTACCCC GACCACATGA
51 AGCAGCACGA CTTCTTCAAG TCCGCCATGC CCGAAGGCTA CGTCCAGGAG
101 AGAACCATCT TCTTCAAGGA CGACGGCAAC TACAAGACCC GCGCCGAGGT
151 GAAGTTCGAG GGCGACACCC TGGTGAACCG CATCGAGCTG AAGGGCATCG
```

## eGFP-P5SM<sub>E/R</sub> SPLICED PRODUCT II

```
1 CACCCTGACC TACGGCGTGC AGTGCTTCAG CCGCTACCCC GACCACATGA
51 AGCAGCACGA CTTCTTCAAG TCCGCCATGC CCGAAGGCTA CGTCCAGGAG
101 GAAATAAATA GCCTTTTGTG TAAATCAAAA GGTCTTACCT ATGTTATTGC
151 GTGAGGCATT GGATCCCAA GAGAGAACTC CAAAATGCGA GGCTACATGT
201 TATGGACTAG TATCAGGTTG GGAGACCTCC TGAGAAGCTC CAGCAAGTAA
251 GCCTCGATCA CGCAAAATGT TTGAGAGAAC CATCTTCTTC AAGGACGACG
301 GCAACTACAA GACCCGCGCC GAGGTGAAGT TCGAGGGCGA CACCCTGGTG
351 AACCGCATCG AGCTGAAGGG CATCGACTTC AAGGAGGACG GCAACATCCT
```

## eGFP-HyP5SM<sub>E/R</sub> gene sequence

```
1 ATGTCTAGAG TGAGCAAGGG CGAGGAGCTG TTCACCGGGG TGGTGCCCAT
51 CCTGGTTCGAG CTGGACGGCG ACGTAAACGG CCACAAGTTC AGCGTGTCCG
101 GCGAGGGCGA GGGCGATGCC ACCTACGGCA AGCTGACCCT GAAGTTCATC
151 TGCACCACCG GCAAGCTGCC CGTGCCCTGG CCCACCCTCG TGACCACCCT
201 GACCTACGGC GTGCAGTGCT TCAGCCGCTA CCCCACCAC ATGAAGCAGC
251 ACGACTTCTT CAAGTCCGCC ATGCCCGAAG GCTACGTCCA GGACGTAGAT
301 TTATGCATCC TCTTGTCATG AGAAGTCGAA TTGTTCCCAT TCTGTGTGTT
351 GCAGCTACAG ATGGAGATAC ATAGAGATAC TCGTGGATTT TGCTTAGTGT
401 TGAGTTTTGT TCTGGTTGTG AACTAAAAGT TTATACATTT GCAGGAAATA
451 AATAGCCTTT TGTTTAAATC AAAAGTCTT ACCTATGTTA GTGTGAAGCA
501 TTGGATCCCA AAGAGAGAAC TCCAAAATGC GATGAGGCAT ATTTAATCTT
551 GTCTGGACTA GTAACAGGTT GGGATGACCA CCTGTGAAGC TCCAACAGGA
601 TTGCCTCCTC ACGCAATGTT TGAGGTCTGA TGTTCAATAG CTTGTTTTGT
651 TTCACTTTCG TTTGGACTTT CTTTTCGCCA ATGAGCTATG TTTCTGATGG
701 TTTTCACTCT TTTGGTGTGT AGAGACCAT CTTCTTCAAG GACGACGGCA
751 ACTACAAGAC CCGCGCCGAG GTGAAGTTCG AGGGCGACAC CCTGGTGAAC
801 CGCATCGAGC TGAAGGGCAT CGACTTCAAG GAGGACGGCA ACATCCTGGG
851 GCACAAGCTG GAGTACAAC ACAACAGCCA CAACGTCTAT ATCATGGCCG
901 ACAAGCAGAA GAACGGCATC AAGGTGAAC TCAAGATCCG CCACAACATC
951 GAGGACGGCA GCGTGCAGCT CGCCGACCAC TACCAGCAGA ACACCCCAT
1001 CGGCGACGGC CCCGTGCTGC TGCCGACAA CCACTACCTG AGCACCCAGT
1051 CCGCCCTGAG CAAAGACCCC AACGAGAAGC GCGATCACAT GGTCTGCTG
1101 GAGTTCGTGA CCGCCGCCGG GATCACTCTC GGCATGGACG AGCTGTACAA
1151 GTAA
```

### eGFP-HyP5SM<sub>E/R</sub> SPLICED PRODUCT I

```
1 CACCCTGACC TACGGCGTGC AGTGCTTCAG CCGCTACCCC GACCACATGA
51 AGCAGCACGA CTTCTTCAAG TCCGCCATGC CCGAAGGCTA CGTCCAGGAG
101 AGAACCATCT TCTTCAAGGA CGACGGCAAC TACAAGACCC GCGCCGAGGT
151 GAAGTTCGAG GGCACACCC TGGTGAACCG CATCGAGCTG AAGGGCATCG
```

### eGFP-HyP5SM<sub>E/R</sub> SPLICED PRODUCT II

```
1 CACCCTGACC TACGGCGTGC AGTGCTTCAG CCGCTACCCC GACCACATGA
51 AGCAGCACGA CTTCTTCAAG TCCGCCATGC CCGAAGGCTA CGTCCAGGAG
101 GAAATAAATA GCCTTTTGT TAAATCAAAA GGTCTTACCT ATGTTAGTGT
151 GAAGCATTTG ATCCCAAAGA GAGAACTCCA AAATGCGATG AGGCATATTT
201 AATCTTGTCT GGACTAGTAA CAGGTTGGGA TGACCACCTG TGAAGCTCCA
251 ACAGGATTGC CTCCTCACGC AATGTTTGAG AGAACCATCT TCTTCAAGGA
301 CGACGGCAAC TACAAGACCC GCGCCGAGGT GAAGTTCGAG GGCACACCC
351 TGGTGAACCG CATCGAGCTG AAGGGCATCG ACTTCAAGGA GGACGGCAAC
```

### eGFP-OsP5SM<sub>E/R</sub> gene sequence

```
1 ATGTCTAGAG TGAGCAAGGG CGAGGAGCTG TTCACCGGGG TGGTGCCCAT
51 CCTGGTTCGAG CTGGACGGCG ACGTAAACGG CCACAAGTTC AGCGTGTCCG
101 GCGAGGGCGA GGGCGATGCC ACCTACGGCA AGCTGACCCT GAAGTTCATC
151 TGCACCACCG GCAAGCTGCC CGTGCCCTGG CCCACCCTCG TGACCACCCT
201 GACCTACGGC GTGCAGTGCT TCAGCCGCTA CCCCACCAC ATGAAGCAGC
251 ACGACTTCTT CAAGTCCGCC ATGCCGAAG GCTACGTCCA GGACGTAGAT
301 TTATGCATCC TCTTGTCATG AGAAGTCGAA TTGTGCCCAT TCTGTGTGTT
351 GCAGCTACAG ATGGAGATAC ATAGAGATAC TCGTGGATTT TGCTTAGTGT
401 TGAGTTTTGT TCTGGTTGTG AACTAAAAGT TTATACATTT GCAGGAAATA
451 AATAGCCTTT TGTTTAAATC AAAAGTCTT ACCTATGTTA GTGTGAAGCA
501 TTGGATCCCA AAGAACTCCA AAATGCGATG AGGCATATTT AATCTTGTCT
551 GGACTAGTAA CAGGTTGGGA TGACCACCTG TGAAGCTCCA ACAGGATTGC
601 CTCCTCACGC AATGTTTGAG GTCTGATGTT CAATAGCTTG TTTTGTTTCA
651 CTTTGCTTTG GACTTTCTTT TCGCCAATGA GCTATGTTTC TGATGGTTTT
701 CACTCTTTTG GTGTGTAGAG AACCATCTT TTCAAGGACG ACGGCAACTA
751 CAAGACCCGC GCCGAGGTGA AGTTCGAGGG CGACACCCTG GTGAACCGCA
801 TCGAGCTGAA GGCATCGAC TTCAAGGAGG ACGGCAACAT CCTGGGGCAC
851 AAGCTGGAGT ACAACTACAA CAGCCACAAC GTCTATATCA TGGCCGACAA
901 GCAGAAGAAC GGCATCAAGG TGAACTTCAA GATCCGCCAC AACATCGAGG
951 ACGGCAGCGT GCAGCTCGCC GACCACTACC AGCAGAACAC CCCCATCGGC
1001 GACGGCCCCG TGCTGCTGCC CGACAACCAC TACCTGAGCA CCCAGTCCGC
1051 CCTGAGCAA GACCCAACG AGAAGCGCGA TCACATGGTC CTGCTGGAGT
1101 TCGTGACCGC CGCCGGGATC ACTCTCGGCA TGGACGAGCT GTACAAGTAA
```

## eGFP-OsP5SM<sub>E/R</sub> SPLICED PRODUCT I

```
1 CACCCTGACC TACGGCGTGC AGTGCTTCAG CCGCTACCCC GACCACATGA
51 AGCAGCACGA CTTCTTCAAG TCCGCCATGC CCGAAGGCTA CGTCCAGGAG
101 AGAACCATCT TCTTCAAGGA CGACGGCAAC TACAAGACCC GCGCCGAGGT
151 GAAGTTCGAG GGCGACACCC TGGTGAACCG CATCGAGCTG AAGGGCATCG
```

## eGFP-OsP5SM<sub>E/R</sub> SPLICED PRODUCT II

```
1 CACCCTGACC TACGGCGTGC AGTGCTTCAG CCGCTACCCC GACCACATGA
51 AGCAGCACGA CTTCTTCAAG TCCGCCATGC CCGAAGGCTA CGTCCAGGAG
101 GAAATAAATA GCCTTTTGTGTT TAAATCAAAA GGTCTTACCT ATGTTAGTGT
151 GAAGCATTGG ATCCCAAAGA ACTCCAAAAT GCGATGAGGC ATATTTAATC
201 TTGTCTGGAC TAGTAACAGG TTGGGATGAC CACCTGTGAA GCTCCAACAG
251 GATTGCCTCC TCACGCAATG TTTGAGAGAA CCATCTTCTT CAAGGACGAC
301 GGCAACTACA AGACCCGCGC CGAGGTGAAG TTCGAGGGCG ACACCCTGGT
351 GAACCGCATC GAGCTGAAGG GCATCGACTT CAAGGAGGAC GGCAACATCC
```

## LUC-P5SM<sub>E/R</sub> gene sequence

```
1 ATGGAAGACG CAAAAACAT AAAGAAAGGC CCGGCGCCAT TCTATCCGCT
51 GGAAGATGGA ACCGCTGGAG AGCAACTGCA TAAGGCTATG AAGAGATACG
101 CCCTGGTTCC TGGAACAATT GCTTTTACAG ATGCACATAT CGAGGTGGAC
151 ATCACTTACG CTGAGTACTT CGAAATGTCC GTTCGGTTGG CAGAAGCTAT
201 GAAACGATAT GGGCTGAATA CAAATCACAG AATCGTCGTA TGCAGTGAAG
251 ACTCTCTTCA ATTCTTTATG CCGGTGTTGG GCGCGTTATT TATCGGAGTT
301 GCAGTTGCGC CCGCGAACGA CATTTATAAT GAGCTTAGATT TATGCATCCT
351 CTTGTCATGA GAAGTCGAAT TGTTCCCATT CTGTGTGTTG CAGCTACAGA
401 TGGAGATAACA TAGAGATACT CGTGGATTTT GCTTAGTGTT GAGTTTTGTT
451 CTGGTTGTGA ACTAAAAGTT TATACATTTG CAGGAAATAA ATAGCCTTTT
501 GTTTAAATCA AAAGGTCTTA CCTATGTTAT TGCGTAGAGGC ATTGGATCCC
551 AAAGAGAGAA CTCCAAAATG CGAGGCTACA TGTTATGGAC TAGTATCAGG
601 TTGGGAGACC TCCTGAGAAG CTCCAGCAAG TAAGCCTCGA TCACGCAAAA
651 TGTTTGAGGT CTGATGTTCA ATAGCTTGTT TTGTTTCACT TTGCTTTGGA
701 CTTTCTTTTC GCCAATGAGC TATGTTTCTG ATGGTTTTCA CTCTTTTGGT
751 GTGTAGAGAG AATTGCTCAA CAGTATGGGC ATTTGCGCAGC CTACCGTGGT
801 GTTCGTTTCC AAAAAGGGT TGCAAAAAAT TTTGAACGTG CAAAAAAGC
851 TCCCAATCAT CAAAAAATT ATTATCATGG ATTCTAAAAC GGATTACCAG
901 GGATTTTCACT CGATGTACAC GTTCGTCACA TCTCATCTAC CTCCCGGTTT
951 TAATGAATAC GATTTTGTGC CAGAGTCCTT CGATAGGGAC AAGACAATTG
1001 CACTGATCAT GAACCTCTCT GGATCTACTG GTCTGCCTAA AGGTGTCGCT
1051 CTGCCTCATA GAACCTGCTG CGTGAGATTC TCGCATGCCA GAGATCCTAT
1101 TTTTGGCAAT CAAATCATTG CGGATACTGC GATTTTAAGT GTTGTTCAT
1151 TCCATCACGG TTTTGAATG TTTACTACAC TCGGATATTT GATATGTGGA
1201 TTTCGAGTCG TCTTAATGTA TAGATTTGAA GAAGAGCTGT TTCTGAGGAG
1251 CCTTCAGGAT TACAAGATTC AAAGTGCCT GCTGGTGCCA ACCCTATTCT
```

1301 CCTTCTTCGC CAAAAGCACT CTGATTGACA AATACGATTT ATCTAATTTA  
 1351 CACGAAATTG CTTCTGGTGG CGCTCCCCTC TCTAAGGAAG TCGGGGAAGC  
 1401 GGTTCGCAAG AGGTTCCATC TGCCAGGTAT CAGGCAAGGA TATGGGCTCA  
 1451 CTGAGACTAC ATCAGCTATT CTGATTACAC CCGAGGGGGA TGATAAACCG  
 1501 GGCGCGGTCG GTAAAGTTGT TCCATTTTTT GAAGCGAAGG TTGTGGATCT  
 1551 GGATACCGGG AAAACGCTGG GCGTTAATCA AAGAGGCGAA CTGTGTGTGA  
 1601 GAGGTCCTAT GATTATGTCC GGTATGTAA ACAATCCGGA AGCGACCAAC  
 1651 GCCTTGATTG ACAAGGATGG ATGGCTACAT TCTGGAGACA TAGCTTACTG  
 1701 GGACGAAGAC GAACACTTCT TCATCGTTGA CCGCCTGAAG TCTCTGATTA  
 1751 AGTACAAAGG CTATCAGGTG GCTCCCGCTG AATTGGAATC CATCTTGCTC  
 1801 CAACACCCCA ACATCTTCGA CGCAGGTGTC GCAGGTCTTC CCGACGATGA  
 1851 CGCCGGTGAA CTTCCCGCCG CCGTTGTTGT TTTGGAGCAC GGAAAGACGA  
 1901 TGACGGAAAA AGAGATCGTG GATTACGTCG CCAGTCAAGT AACAACCGCG  
 1951 AAAAAGTTGC GCGGAGGAGT TGTGTTTGTG GACGAAGTAC CGAAAGGTCT  
 2001 TACCGGAAAA CTCGACGCAA GAAAAATCAG AGAGATCCTC ATAAAGGCCA  
 2051 AGAAGGGCGG AAAGATCGCC GTG**TAA**

### LUC-P5SM<sub>E/R</sub> SPLICED PRODUCT I

1 GACATCACTT ACGCTGAGTA CTTCGAAATG TCCGTTCCGGT TGGCAGAAGC  
 51 TATGAAACGA TATGGGCTGA ATACAAATCA CAGAATCGTC GTATGCAGTG  
 101 AAAACTCTCT TCAATTCTTT ATGCCGGTGT TGGGCGCGTT ATTTATCGGA  
 151 GTTGCAGTTG CGCCCGCGAA CGACATTTAT AATGAGAGAG AATTGCTCAA  
 201 CAGTATGGGC ATTTTCGAGC CTACCGTGGT GTTCGTTTCC AAAAAGGGGT  
 251 TGCAAAAAAT TTTGAACGTG CAAAAAAGC TCCAATCAT CCAAAAAATT

### LUC-P5SM<sub>E/R</sub> SPLICED PRODUCT II

1 GACATCACTT ACGCTGAGTA CTTCGAAATG TCCGTTCCGGT TGGCAGAAGC  
 51 TATGAAACGA TATGGGCTGA ATACAAATCA CAGAATCGTC GTATGCAGTG  
 101 AAAACTCTCT TCAATTCTTT ATGCCGGTGT TGGGCGCGTT ATTTATCGGA  
 151 GTTGCAGTTG CGCCCGCGAA CGACATTTAT AAT**GAG**GAAA TAAATAGCCT  
 201 TTTGTTTAAA TCAAAGGTC TTACCTATGT TATTGCG**TGA** GGCATTGGAT  
 251 CCCAAAGAGA GAACTCCAAA ATGCGAGGCT ACATGTTATG GACTAGTATC  
 301 AGGTTGGGAG ACCTCCTGAG AAGCTCCAGC AAGTAAGCCT CGATCACGCA  
 351 AAATGTTTGA G**AGA**GAAATG CTCAACAGTA TGGGCATTTT GCAGCCTACC  
 401 GTGGTGTTCG TTTCCAAAA GGGGTTGCA**A** AAAATTTTGA ACGTGCAAAA

## LUC-P5SM<sub>K/R</sub> gene sequence

```
1 ATGGAAGACG CAAAAACAT AAAGAAAGGC CCGGCGCCAT TCTATCCGCT
51 GGAAGATGGA ACCGCTGGAG AGCAACTGCA TAAGGCTATG AAGAGATACG
101 CCCTGGTTCC TGGAACAATT GCTTTTACAG ATGCACATAT CGAGGTGGAC
151 ATCACTTACG CTGAGTACTT CGAAATGTCC GTTCGGTTGG CAGAAGCTAT
201 GAAGGTAGAT TTATGCATCC TCTTGTTCATG AGAAGTCGAA TTGTTCCCAT
251 TCTGTGTGTT GCAGCTACAG ATGGAGATAC ATAGAGATAC TCGTGGATTT
301 TGCTTAGTGT TGAGTTTTGT TCTGGTTGTG AACTAAAAGT TTATACATTT
351 GCAGGAAATA AATAGCCTTT TGTTTAAATC AAAAGGTCTT ACCTATGTTA
401 TTGCGTGAGG CATTGGATCC CAAAGAGAGA ACTCCAAAAT GCGAGGCTAC
451 ATGTTATGGA CTAGTATCAG GTTGGGAGAC CTCCTGAGAA GCTCCAGCAA
501 GTAAGCCTCG ATCACGCAA ATGTTTGAGG TCTGATGTTC AATAGCTTGT
551 TTTGTTTCAC TTTGCTTTGG ACTTTCCTTT CGCCAATGAG CTATGTTTCT
601 GATGGTTTTT ACTCTTTTGG TGTGTAGAGA TATGGGCTGA ATACAAATCA
651 CAGAATCGTC GTATGCAGTG AAAACTCTCT TCAATTCTTT ATGCCGGTGT
701 TGGGCGCGTT ATTTATCGGA GTTGCACTTG CGCCCGCGAA CGACATTTAT
751 AATGAACGTG AATTGCTCAA CAGTATGGGC ATTTTCGCAGC CTACCGTGGT
801 GTTCGTTTCC AAAAAGGGGT TGCAAAAAAT TTTGAACGTG CAAAAAAGC
851 TCCAATCAT CAAAAAATT ATTATCATGG ATTCTAAAAC GGATTACCAG
901 GGATTTTCACT CGATGTACAC GTTCGTCACA TCTCATCTAC CTCCCGGTTT
951 TAATGAATAC GATTTTGTGC CAGAGTCCTT CGATAGGGAC AAGACAATTG
1001 CACTGATCAT GAACTCCTCT GGATCTACTG GTCTGCCTAA AGGTGTCGCT
1051 CTGCCTCATA GAACTGCCTG CGTGAGATTC TCGCATGCCA GAGATCCTAT
1101 TTTTGGCAAT CAAATCATT CCGATACTGC GATTTTAAGT GTTGTTCAT
1151 FCCATCACGG TTTTGGAAATG TTTACTACAC TCGGATATTT GATATGTGGA
1201 TTTCGAGTCG TCTTAATGTA TAGATTTGAA GAAGAGCTGT TTCTGAGGAG
1251 CCTTCAGGAT TACAAGATTC AAAGTGCCT GCTGGTGCCA ACCCTATTCT
1301 CCTTCTTCGC CAAAAGCACT CTGATTGACA AATACGATTT ATCTAATTTA
1351 CACGAAATTG CTTCTGGTGG CGCTCCCCTC TCTAAGGAAG TCGGGGAAGC
1401 GGTTGCCAAG AGGTTCCATC TGCCAGGTAT CAGGCAAGGA TATGGGCTCA
1451 CTGAGACTAC ATCAGCTATT CTGATTACAC CCGAGGGGGA TGATAAACCG
1501 GGC GCGGTGCG GTAAAGTTGT TCCATTTTTT GAAGCGAAGG TTGTGGATCT
1551 GGATACCGGG AAAACGCTGG GCGTTAATCA AAGAGGCGAA CTGTGTGTGA
1601 GAGGTCCTAT GATTATGTCC GGTTATGTAA ACAATCCGGA AGCGACCAAC
1651 GCCTTGATTG ACAAGGATGG ATGGCTACAT TCTGGAGACA TAGCTTACTG
1701 GGACGAAGAC GAACACTTCT TCATCGTTGA CCGCCTGAAG TCTCTGATTA
1751 AGTACAAAGG CTATCAGGTG GCTCCCGCTG AATTGGAATC CATCTTGCTC
1801 CAACACCCCA ACATCTTCGA CGCAGGTGTC GCAGGTCTTC CCGACGATGA
1851 CGCCGGTGAA CTTCCCGCCG CCGTTGTTGT TTTGGAGCAC GGAAAGACGA
1901 TGACGGAAAA AGAGATCGTG GATTACGTCG CCAGTCAAGT AACACC GCG
1951 AAAAAGTTGC GCGGAGGAGT TGTGTTTGTG GACGAAGTAC CGAAAGGTCT
2001 TACCGGAAAA CTCGACGCAA GAAAAATCAG AGAGATCCTC ATAAAGGCCA
2051 AGAAGGGCGG AAAGATCGCC GTGTAA
```

## LUC-P5SM<sub>K/R</sub> SPLICED PRODUCT I

```
1 CATAAAGAAA GGCCCGGCGC CATTCTATCC GCTGGAAGAT GGAACCGCTG
51 GAGAGCAACT GCATAAGGCT ATGAAGAGAT ACGCCCTGGT TCCTGGAACA
101 ATTGCTTTTA CAGATGCACA TATCGAGGTG GACATCACTT ACGCTGAGTA
151 CTTCGAAATG TCCGTTCCGT TGGCAGAAGC TATGAAGAGA TATGGGCTGA
201 ATACAAATCA CAGAATCGTC GTATGCAGTG AAAACTCTCT TCAATTCTTT
251 ATGCCGGTGT TGGGCGCGTT ATTTATCGGA GTTGCAGT TG CGCCCGCGAA
```

## LUC-P5SM<sub>K/R</sub> SPLICED PRODUCT II

```
1 CATAAAGAAA GGCCCGGCGC CATTCTATCC GCTGGAAGAT GGAACCGCTG
51 GAGAGCAACT GCATAAGGCT ATGAAGAGAT ACGCCCTGGT TCCTGGAACA
101 ATTGCTTTTA CAGATGCACA TATCGAGGTG GACATCACTT ACGCTGAGTA
151 CTTCGAAATG TCCGTTCCGT TGGCAGAAGC TATGAAGGAA ATAAATAGCC
201 TTTTGTTTAA ATCAAAGGT CTTACCTATG TTATTGCGTG AGGCATTGGA
251 TCCCAAAGAG AGAACTCCAA AATGCGAGGC TACATGTTAT GGA TAGTAT
301 CAGGTTGGGA GACCTCCTGA GAAGCTCCAG CAAGTAAGCC TCGATCACGC
351 AAAATGTTTG AGAGATATGG GCTGAATACA AATCACAGAA TCGTCGTATG
401 CAGTGAAAAC TCTCTTCAAT TCTTTATGCC GGTGTTGGGC GCGTTATTTA
451 TCGGAGTTGC AGT TGGCGCCC GCGAACGACA TTTATAATGA ACGTGAATTG
```

## CYP707A3-P5SM<sub>E/S</sub> gene sequence (AT5G45340.1)

```
1 ATGGATTTCT CCGGTTTGTT TCTCACTCTC TCCGCGGCGG CTCTGTTTCT
51 CTGTTTACTC CGATTTATCG CCGGAGTCCG CCGTAGCTCC TCCACGAAAC
101 FCCCTCTTCC TCCGGGAACA ATGGGTTATC CTTACGTCGG CGAAACATTC
151 CAACTTTACT CACAAGACCC TAATGTGTTT TTTGCAGCAA AACAGAGAAG
201 ATACGGATCG GTGTTCAAGA CTCATGTATT GGGATGTCCA TGTGTGATGA
251 TCTCGAGCCC TGAAGCAGCG AAATTCGTAT TGGTTACAAA GTCTCATTTG
301 FTTAAACCGA CTTTTCCGGC CAGTAAAGAG AGGATGCTTG GAAAACAAGC
351 CATCTTCTTC CATCAAGGAG ATTATCATTC CAAACTTAGA AAGCTTGTTT
401 TAAGAGCTTT CATGCCTGAT GCAATCAGAA ACATGGTCCC TCACATTGAG
451 GTAGATTTAT GCATCCTCTT GTCATGAGAA GTCGAATTGT TCCCATTCTG
501 TGTGTTGCAG CTACAGATGG AGATACATAG AGATACTCGT GGATTTTGCT
551 TAGTGTTGAG TTTTGTCTCG GTTGTGA ACT AAAAGTTTAT ACATTTGCAG
601 GAAATAAATA GCCTTTTGTT TAAATCAAAA GGTCTTACCT ATGTTATTGC
651 GTGAGGCATT GGATCCCAA GAGAGA ACT CAAAATGCGA GGCTACATGT
701 TATGGACTAG TATCAGTTG GGAGACCTCC TGAGAAGCTC CAGCAAGTAA
751 GCCTCGATCA CGCAAATGT TTGAGGTTCTG ATGTTCAATA GCTTGTTTTG
801 TTTCACTTTG CTTTGGACTT TCTTTTCGCC AATGAGCTAT GTTTCTGATG
851 GTTTTCACTC TTTTGGTGTG TAGAGTATTG CTCAAGAATC ACTCAATTCT
901 TGGGATGGAA CTCAACTCAA CACTTACCAG GAAATGAAAA CATACTTTT
951 CAATGTTGCG TTAATCTCAA TACTCGGCAA AGACGAAGTT TATTACCGAG
```

1001 AAGATCTAAA ACGATGCTAC TACATTCTAG AGAAAGGTTA CAATTCGATG  
 1051 CCGATTAATC TTCCAGGAAC ATTATTCCAC AAAGCCATGA AAGCTCGCAA  
 1101 GGAGCTAGCT CAAATCCTCG CTAACATCTT ATCCAAAAGA AGACAAAACC  
 1151 CATCATCACA CACAGATCTC CTCGGATCAT TCATGGAAGA CAAAGCAGGA  
 1201 TTAACCGACG AACAAATCGC CGATAACATC ATCGGAGTAA TCTTCGCCGC  
 1251 AAGAGACACG ACGGCGAGTG TTCTGACGTG GATCCTCAAG TACTTAGCTG  
 1301 ATAATCCAAC TGTTCTAGAA GCTGTCACTG AAGAGCAAAT GGCAATAAGG  
 1351 AAAGATAAAA AAGAAGGAGA GAGTCTCACT TGGGAAGATA CAAAGAAGAT  
 1401 GCCATTAACT TATAGAGTAA TCCAAGAGAC ATTAAGAGCT GCTACAATCT  
 1451 TATCTTTCAC ATTTAGAGAA GCTGTGGAAG ATGTGGAATA CGAAGGATAT  
 1501 TTGATACCAA AGGGATGGAA AGTACTGCCA CTATTCAGAA ATATTCATCA  
 1551 CAATGCTGAT ATATTTTCGG ATCCGGGGAA ATTCGATCCG TCGAGATTCG  
 1601 AAGTTGCGCC GAAACCGAAT ACATTCATGC CTTTGGGTAG TGGGATTCAT  
 1651 TCTTGTCCAG GCAATGAGTT AGCTAAACTT GAAATCTCTG TTCTAATCCA  
 1701 TCATCTCACC ACTAAGTACA GATGGTCAAT CGTAGGGCCT AGCGATGGAA  
 1751 TTCAGTATGG GCCGTTCGCT CTTCTCAGA ATGGATTGCC TATTGCCTTG  
 1801 GAACGAAAAC CATAG

### CYP707A3-P5SM<sub>E/S</sub> SPLICED PRODUCT I

1 ACCCTAATGT GTTCTTTGCA GCAAACAGA GAAGATACGG ATCGGTGTTC  
 51 AAGACTCATG TATTGGGATG TCCATGTGTG ATGATCTCGA GCCCTGAAGC  
 101 AGCGAAATTC GTATTGGTTA CAAAGTCTCA TTTGTTTAAA CCGACTTTTC  
 151 CGGCCAGTAA AGAGAGGATG CTTGGAAAAC AAGCCATCTT CTTCCATCAA  
 201 GGAGATTATC ATTCCAAACT TAGAAAGCTT GTTTTAAGAG CTTTCATGCC  
 251 TGATGCAATC AGAAACATGG TCCCTCACAT TGAGAGATT GCTCAAGAAT  
 301 CACTCAATTC TTGGGATGGA ACTCAACTCA ACACTTACCA GGAAATGAAA

### CYP707A3-P5SM<sub>E/S</sub> SPLICED PRODUCT II

1 ACCCTAATGT GTTCTTTGCA GCAAACAGA GAAGATACGG ATCGGTGTTC  
 51 AAGACTCATG TATTGGGATG TCCATGTGTG ATGATCTCGA GCCCTGAAGC  
 101 AGCGAAATTC GTATTGGTTA CAAAGTCTCA TTTGTTTAAA CCGACTTTTC  
 151 CGGCCAGTAA AGAGAGGATG CTTGGAAAAC AAGCCATCTT CTTCCATCAA  
 201 GGAGATTATC ATTCCAAACT TAGAAAGCTT GTTTTAAGAG CTTTCATGCC  
 251 TGATGCAATC AGAAACATGG TCCCTCACAT TGAGGAAATA AATAGCCTTT  
 301 TGTTTAAATC AAAAGGTCTT ACCTATGTTA TTGCGTGAAG CATTGGATCC  
 351 CAAAGAGAGA ACTCCAAAT GCGAGGCTAC ATGTTATGGA CTAGTATCAG  
 401 GTTGGGAGAC CTCCTGAGAA GCTCCAGCAA GTAAGCCTCG ATCACGCAA  
 451 ATGTTTGAG GAATTGCTCA AGAATCACTC AATTCCTGGG ATGGAACCTCA  
 501 ACTCAACACT TACCAGGAAA TGAAAACATA CACTTTCAAT GTTGCCTTAA



## CYP707A3-P5SM<sub>K/R</sub> gene sequence (AT5G45340.1)

```
1 ATGGATTCT CCGGTTTGT TCTCACTCT TCCGCGGCG CTCTGTTTCT
51 CTGTTTACT CGATTTATCG CCGGAGTCCG CCGTAGCTCC TCCACGAAAC
101 TCCCTCTTCC TCCGGGAACA ATGGGTTATC CTTACGTCGG CGAAACATTC
151 CAACTTTACT CACAAGACCC TAATGTGTTT TTTGCAGCAA AACAGAGAAG
201 ATACGGATCG GTGTTCAAGA CTCATGTATT GGGATGTCCA TGTGTGATGA
251 TCTCGAGCCC TGAAGCAGCG AAATTCGTAT TGGTTACAAA GTCTCATTTG
301 TTAAACCGA CTTTTCCGGC CAGTAAAGAG AGGATGCTTG GAAAACAAGC
351 CATCTTCTTC CATCAAGGAG ATTATCATT CAAACTTAGA AAGCTTGTTT
401 TAAGAGCTTT CATGCCTGAT GCAATCAGAA ACATGGTCCC TCACATTGAA
451 TCAATTGCTC AAGAATCACT CAATTCTTGG GATGGAACTC AACTCAACAC
501 TTACCAGGAA ATGAAAACAT ACACTTTCAA TGTTGCGTTA ATCTCAATAC
551 TCGGCAAAGA CGAAGTTTAT TACCGAGAAG ATCTAAGGT AGATTTATGC
601 ATCCTCTTGT CATGAGAAGT CGAATTGTTC CCATTCTGTG TGTTGCAGCT
651 ACAGATGGAG ATACATAGAG ATACTCGTGG ATTTTGCTTA GTGTTGAGTT
701 TTGTTCTGGT TGTGAACTAA AAGTTTATAC ATTTGCAGGA AATAAATAGC
751 CTTTTGTTTA AATCAAAGG TCTTACCTAT GTTATTGCGT GAGGCATTGG
801 ATCCCAAAGA GAGAACTCCA AAATGCGAGG CTACATGTTA TGGACTAGTA
851 TCAGGTTGGG AGACCTCCTG AGAAGCTCCA GCAAGTAAGC CTCGATCACG
901 CAAAATGTTT GAGGTCGTAT GTTCAATAGC TTGTTTTGTT TCACTTTGCT
951 TTGACTTTC TTTTCGCCAA TGAGCTATGT TTCTGATGGT TTTACTCTT
1001 TTGGTGTGTA GAGATGCTAC TACATTCTAG AGAAAGGTTA CAATTTCGATG
1051 CCGATTAATC TTCCAGGAAC ATTATTCCAC AAAGCCATGA AAGCTCGCAA
1101 GGAGCTAGCT CAAATCCTCG CTAACATCTT ATCCAAAAGA AGACAAAACC
1151 CATCATCACA CACAGATCTC CTCGGATCAT TCATGGAAGA CAAAGCAGGA
1201 TTAACCGACG AACAAATCGC CGATAACATC ATCGGAGTAA TCTTCGCCGC
1251 AAGAGACACG ACGGCGAGTG TTCTGACGTG GATCCTCAAG TACTTAGCTG
1301 ATAATCCAAC TGTTCTAGAA GCTGTCACTG AAGAGCAAAT GGCAATAAGG
1351 AAAGATAAAA AAGAAGGAGA GAGTCTCACT TGGGAAGATA CAAAGAAGAT
1401 GCCATTAACT TATAGAGTAA TCCAAGAGAC ATTAAGAGCT GCTACAATCT
1451 TATCTTTCAC ATTTAGAGAA GCTGTGAAG ATGTGAATA CGAAGGATAT
1501 TTGATACCAA AGGGATGGAA AGTACTGCCA CTATTCAGAA ATATTCATCA
1551 CAATGCTGAT ATATTTTCGG ATCCGGGGAA ATTCGATCCG TCGAGATTCG
1601 AAGTTGCGCC GAAACCGAAT ACATTCATGC CTTTTGGTAG TGGGATTCAT
1651 TCTTGTCAG GCAATGAGTT AGCTAAACTT GAAATCTCTG TTCTAATCCA
1701 TCATCTCACC ACTAAGTACA GATGGTCAAT CGTAGGGCCT AGCGATGGAA
1751 TTCAGTATGG GCCGTTGCTT CTTCCTCAGA ATGGATTGCC TATTGCCTTG
1801 GAACGAAAAC CATTAG
```

## CYP707A3-P5SM<sub>K/R</sub> SPLICED PRODUCT I

```
1 CATGCCTGAT GCAATCAGAA ACATGGTCCC TCACATTGAA TCAATTGCTC
51 AAGAATCACT CAATTCTTGG GATGGAACTC AACTCAACAC TTACCAGGAA
101 ATGAAAACAT ACACTTTCAA TGTTGCGTTA ATCTCAATAC TCGGCAAAGA
151 CGAAGTTTAT TACCGAGAAG ATCTAAGAG ATGCTACTAC ATTCTAGAGA
```

201 AAGGTTACAA TTCGATGCCG ATTAATCTTC CAGGAACATT ATTCCACAAA  
 251 GCCATGAAAG CTCGCAAGGA GCTAGCTCAA ATCCTCGCTA ACATCTTATC  
 301 CAAAAGAAGA CAAAACCCAT CATCACACAC AGATCTCCTC GGATCATTCA

**CYP707A3-P5SM<sub>K/R</sub> SPLICED PRODUCT II**

1 CATGCCTGAT GCAATCAGAA ACATGGTCCC TCACATTGAA TCAATTGCTC  
 51 AAGAATCACT CAATTCTTGG GATGGAAGCTC AACTCAACAC TTACCAGGAA  
 101 ATGAAAACAT ACACTTTCAA TGTTGCGTTA ATCTCAATAC TCGGCAAAGA  
 151 CGAAGTTTAT TACCGAGAAG ATCTAAAGGA AATAAATAGC CTTTTGTTTA  
 201 AATCAAAGG TCTTACCTAT GTTATTGCGT GAGGCATTGG ATCCCAAAGA  
 251 GAGAACTCCA AAATGCGAGG CTACATGTTA TGGACTAGTA TCAGGTTGGG  
 301 AGACCTCCTG AGAAGCTCCA GCAAGTAAGC CTCGATCACG CAAAATGTTT  
 351 GAGAGATGCT ACTACATTCT AGAGAAAGGT TACAATTCGA TGCCGATTAA  
 401 TCTTCCAGGA ACATTATTCC ACAAAGCCAT GAAAGCTCGC AAGGAGCTAG  
 451 CTCAAATCCT CGCTAACATC TTATCCAAA GAAGACAAA CCCATCATCA  
 501 CACACAGATC TCCTCGGATC ATTCATGGAA GACAAAGCAG GATTAACCGA

**PSY-P5SM<sub>C/R</sub> gene sequence (AT5G17230.1)**

1 ATGTCTTCTT CTGTAGCAGT GTTATGGGTT GCTACTTCTT CTCTAAATCC  
 51 AGACCCAATG AACAAATTGTG GGTGTAAG GGTCTAGAA TCTTCTAGAC  
 101 TGTTCTCTCC TTGTCAGAAT CAGAGACTAA ACAAAGGTAA GAAGAAGCAG  
 151 ATACCAACTT GGAGTTCTTC TTTTGTAAGG AACC GAAGTA GAAGAATTGG  
 201 TGTTGTGTCT TCAAGCTTAG TAGCAAGTCC TTCTGGAGAG ATAGCTCTTT  
 251 CATCTGAAGA GAAGGTTTAC AATGTTGTGT TGAAACAAGC TGCTTTGGTG  
 301 AACAAACAGC TAAGGTCTTC TTCTTATGAC CTTGATGTGA AGAAACCACA  
 351 AGATGTTGTT CTTCTGGGA GTTTGAGTTT GTTGGGTGAA GCTTATGATC  
 401 GATGCGGTGA AGTTTGCCT GAATATGCTA AGACGTTTTA TCTTGGAACT  
 451 TTGCTTATGA CACCCGAAAG GCGAAAGCG ATTTGGGCAA TCTACGTTTG  
 501 GTGCTAGAT TTATGCATCC TCTTGTCATG AGAAGTCGAA TTGTTCCCAT  
 551 TCTGTGTGTT GCAGCTACAG ATGGAGATAC ATAGAGATAC TCGTGGATTT  
 601 TGCTTAGTGT TGAGTTTTGT TCTGGTTGTG AACTAAAAGT TTATACATTT  
 651 GCAGGAAATA AATAGCCTTT TGTTTAAATC AAAAGGTCTT ACCTATGTTA  
 701 TTGCGTGAGG CATTGGATCC CAAAGAGAGA ACTCCAAAAT GCGAGGCTAC  
 751 ATGTTATGGA CTAGTATCAG GTTGGGAGAC CTCCTGAGAA GCTCCAGCAA  
 801 GTAAGCCTCG ATCACGCAA ATGTTGAGG TCTGATGTTT AATAGCTTGT  
 851 TTTGTTTAC TTTGCTTTGG ACTTTCTTTT CGCCAATGAG CTATGTTTCT  
 901 GATGGTTTTT ACTCTTTTGG TGTGTAGAGA AGAACTGATG AACTTGTGGA  
 951 TGGGCCAAAT GCTTCACATA TAACTCCCAT GGCTTTAGAT AGATGGGAAG  
 1001 CAAGGTTAGA AGATCTTTTC CGTGGTCGTC CTTTCGATAT GCTTGATGCT  
 1051 GCTCTCGCTG ATACAGTTGC TAGATACCCG GTCGATATTC AGCCATTTTCG  
 1101 AGACATGATC GAAGGAATGA GAATGGACTT GAAGAAATCG AGATACCAGA  
 1151 ACTTCGATGA TCTATACCTT TACTGCTACT ACGTCGCTGG AACCGTCGGA  
 1201 TTGATGAGCG TTCCGTTTAT GGAATCGAT CCTAAGTCGA AAGCAACAAC

1251 CGAAAGTGTT TACAACGCTG CCTTGGCCCT TGGTATAGCC AATCAGCTTA  
 1301 CTAACATACT CAGAGACGTA GGCGAAGATG CGAGAAGAGG AAGGGTTTAT  
 1351 CTGCCTCAGG ATGAATTGGC TCAGGCTGGT CTTTCAGATG AAGACATATT  
 1401 CGCCGGAAAA GTAACGATA AATGGAGAAA CTTCATGAAA ATGCAGCTTA  
 1451 AACGAGCAAG AATGTTCTTC GACGAAGCTG AGAAAGGCGT CACCGAGCTC  
 1501 AGTGCCGCTA GCAGATGGCC TGTATGGGCT TCATTGCTAT TGTACAGGAG  
 1551 AATACTGGAC GAGATTGAAG CGAATGATTA CAACAATTTT ACTAAGAGAG  
 1601 CTTATGTGGG GAAAGTCAAG AAAATTGCAG CTTTGCCATT GGCTTATGCT  
 1651 AAATCAGTAC TAAAGACTTC AAGTTCAAGA CTATCGATA T GA

### PSY-P5SM<sub>C/R</sub> SPLICED PRODUCT III

1 CTTGATGTGA AGAAACCACA AGATGTTGTT CTTCTGGGA GTTTGAGTTT  
 51 GTTGGGTGAA GCTTATGATC GATGCGGTGA AGTTTGCCT GAATATGCTA  
 101 AGACGTTTTA TCTTGAACT TTGCTTATGA CACCCGAAAG GCGAAAGGCG  
 151 ATTTGGGCAA TCTACGTTTG AGAAGAAGCTG ATGAACTTGT GGATGGGCCA  
 201 AATGCTTCAC ATATAACTCC CATGGCTTTA GATAGATGGG AAGCAAGGTT  
 251 AGAAGATCTT TTCCGTGGTC GTCCTTTCGA TATGCTTGAT GCTGCTCTCG

### PSY-P5SM<sub>C/R</sub> SPLICED PRODUCT V

1 CTTGATGTGA AGAAACCACA AGATGTTGTT CTTCTGGGA GTTTGAGTTT  
 51 GTTGGGTGAA GCTTATGATC GATGCGGTGA AGTTTGCCT GAATATGCTA  
 101 AGACGTTTTA TCTTGAACT TTGCTTATGA CACCCGAAAG GCGAAAGGCG  
 151 ATTTGGGCAA TCTACGTTTG GAAATAAATA GCCTTTTGT TAAATCAAAA  
 201 GGTCTTACCT ATGTTATTGC GTGAGGCATT GGATCCCAA GAGAGAAGTC  
 251 CAAAATGCGA GGCTACATGT TATGGACTAG TATCAGGTTG GGAGACCTCC  
 301 TGAGAAGCTC CAGCAAGTAA GCCTCGATCA CGCAAATGT TTGAGAGAAG  
 351 AACTGATGAA CTTGTGGATG GGCCAAATGC TTCACATATA ACTCCCATGG  
 401 CTTTAGATAG ATGGGAAGCA AGGTTAGAAG ATCTTTTCCG TGGTCGTCCT  
 451 TTCGATATGC TTGATGCTGC TCTCGCTGAT ACAGTTGCTA GATACCCGGT

### PSY-P5SM<sub>C/R</sub> SPLICED PRODUCT IV

1 CTTGATGTGA AGAAACCACA AGATGTTGTT CTTCTGGGA GTTTGAGTTT  
 51 GTTGGGTGAA GCTTATGATC GATGCGGTGA AGTTTGCCT GAATATGCTA  
 101 AGACGTTTTA TCTTGAACT TTGCTTATGA CACCCGAAAG GCGAAAGGCG  
 151 ATTTGGGCAA TCTACGTTTG GTCCGTAGAT TTATGCATCC TCTTGTCTATG  
 201 AGAAGTCGAA TTGTTCCCAT TCTGTGTGTT GCAGCTACAG ATGGAGATAC  
 251 ATAGAGATAC TCGTGGATTT TGCTTAGTGT TGAGTTTTGT TCTGGTTGTG  
 301 AACTAAAAGT TTATACATTT GCAGGAAATA AATAGCCTTT TGTAAATC  
 351 AAAAGGTCTT ACCTATGTTA TTGCGTAGG CATTGGATCC CAAAGAGAGA  
 401 ACTCCAAAAT GCGAGGCTAC ATGTTATGGA CTAGTATCAG GTTGGGAGAC

451 CTCCTGAGAA GCTCCAGCAA GTAAGCCTCG ATCACGCAA ATGTTTGAGA  
501 GAAGAAGTGA TGAAGTTGTG GATGGGCCAA ATGCTTCACA TATAACTCCC  
551 ATGGCTTTAG ATAGATGGGA AGCAAGGTTA GAAGATCTTT TCCGTGGTCC  
601 TCCTTTTCGAT ATGCTTGATG CTGCTCTCGC TGATACAGTT GCTAGATACC

**PSY-P5SM<sub>E/R</sub> gene sequence (AT5G17230.1)**

1 ATGTCTTCTT CTGTAGCAGT GTTATGGGTT GCTACTTCTT CTCTAAATCC  
51 AGACCCAATG AACAAATTGTG GGTGTTGTAAG GGTTCCTAGAA TCTTCTAGAC  
101 TGTTCCTCTCC TTGTCAGAAT CAGAGACTAA ACAAAGGTAA GAAGAAGCAG  
151 ATACCAACTT GGAGTTCCTC TTTTGTAAGG AACCGAAGTA GAAGAATTGG  
201 TGTGTGTCT TCAAGCTTAG TAGCAAGTCC TTCTGGAGAG ATAGCTCTTT  
251 CATCTGAAGA GAAGGTTTAC AATGTTGTGT TGAAACAAGC TGCTTTGGTG  
301 AACAAACAGC TAAGGTCTTC TTCTTATGAC CTTGATGTGA AGAAACCACA  
351 AGATGTTGTT CTTCTGGGA GTTTGAGTTT GTTGGGTGAA GCTTATGATC  
401 GATGCGGTGA AGTTTGCCTT GAATATGCTA AGACGTTTTA TCTTGGAAC  
451 TTGCTTATGA CACCCGAGGT AGATTTATGC ATCCTCTTGT CATGAGAAGT  
501 CGAATTGTTT CCATTCTGTG TGTTGCAGCT ACAGATGGAG ATACATAGAG  
551 ATACTCGTGG ATTTTGCTTA GTGTTGAGTT TTGTTCTGGT TGTGAACATA  
601 AAGTTTATAC ATTTGCAGGA AATAAATAGC CTTTTGTTTA AATCAAAGG  
651 TCTTACCTAT GTTATTGCGT GAGGCATTGG ATCCCAAAGA GAGAAGTCCA  
701 AAATGCGAGG CTACATGTTA TGGACTAGTA TCAGGTTGGG AGACCTCCTG  
751 AGAAGCTCCA GCAAGTAAGC CTCGATCACG CAAAATGTTT GAGGCTCTGAT  
801 GTTCAATAGC TTGTTTTGTT TCACTTTGCT TTGGACTTTC TTTTCGCCAA  
851 TGAGCTATGT TTCTGATGGT TTTCACTCTT TTGGTGTGTA GAGACGAAAG  
901 GCGATTTGGG CAATCTACGT TTGGTGTAGA AGAACTGATG AACTTGTGGA  
951 TGGGCCAAAT GCTTCACATA TAACTCCAT GGCTTTAGAT AGATGGGAAG  
1001 CAAGGTTAGA AGATCTTTTC CGTGGTCGTC CTTTCGATAT GCTTGATGCT  
1051 GCTCTCGCTG ATACAGTTGC TAGATACCCG GTCGATATTC AGCCATTTCC  
1101 AGACATGATC GAAGGAATGA GAATGGACTT GAAGAAATCG AGATACCAGA  
1151 ACTTCGATGA TCTATACCTT TACTGCTACT ACGTCGCTGG AACCGTCGGA  
1201 TTGATGAGCG TTCCGTTTAT GGGAAATCGAT CCTAAGTCGA AAGCAACAAC  
1251 CGAAAGTGT TACAACGCTG CCTTGCCCTT TGGTATAGCC AATCAGCTTA  
1301 CTAACATACT CAGAGACGTA GCGAAGATG CGAGAAGAGG AAGGGTTTAT  
1351 CTGCCTCAGG ATGAATTGGC TCAGGCTGGT CTTTCAGATG AAGACATATT  
1401 CGCCGAAAA GTAAGTATA AATGGAGAAA CTTTATGAAA ATGCAGCTTA  
1451 AACGAGCAAG AATGTTCTTC GACGAAGCTG AGAAAGGCGT CACCGAGCTC  
1501 AGTGCCGCTA GCAGATGGCC TGTATGGGCT TCATTGCTAT TGTACAGGAG  
1551 AATACTGGAC GAGATTGAAG CGAATGATTA CAACAATTTT ACTAAGAGAG  
1601 CTTATGTGGG GAAAGTCAAG AAAATTGCAG CTTTGCCATT GGCTTATGCT  
1651 AAATCAGTAC TAAAGACTTC AAGTTCAAGA CTATCGATAT GA

## PSY-P5SM<sub>E/R</sub> SPLICED PRODUCT I

```
1 CTTGATGTGA AGAAACCACA AGATGTTGTT CTTCTGGGA GTTTGAGTTT
51 GTTGGGTGAA GCTTATGATC GATGCGGTGA AGTTTGCGCT GAATATGCTA
101 AGACGTTTTA TCTTGGA ACT TTGCTTATGA CACCCGAGAG ACGAAAGGCG
151 ATTTGGGCAA TCTACGTTG GTGTAGAAGA ACTGATGAAC TTGTGGATGG
201 GCCAAATGCT TCACATATAA CTCCATGGC TTTAGATAGA TGGGAAGCAA
251 GGTTAGAAGA TCTTTCCGT GGTCTCCTT TCGATATGCT TGATGCTGCT
```

## PSY-P5SM<sub>E/R</sub> SPLICED PRODUCT II

```
1 CTTGATGTGA AGAAACCACA AGATGTTGTT CTTCTGGGA GTTTGAGTTT
51 GTTGGGTGAA GCTTATGATC GATGCGGTGA AGTTTGCGCT GAATATGCTA
101 AGACGTTTTA TCTTGGA ACT TTGCTTATGA CACCCGAGGA AATAAATAGC
151 CTTTTGTTTA AATCAAAGG TCTTACCTAT GTTATTGCGT GAGGCATTGG
201 ATCCCAAAGA GAGAACTCCA AAATGCGAGG CTACATGTTA TGGACTAGTA
251 TCAGGTTGGG AGACCTCCTG AGAAGCTCCA GCAAGTAAGC CTCGATCACG
301 CAAAATGTTT GAGAGACGAA AGGCGATTTG GGCAATCTAC GTTTGGTGTGA
351 GAAGA ACTGA TGA ACTTGTG GATGGGCCAA ATGCTTCACA TATAACTCCC
401 ATGGCTTTAG ATAGATGGGA AGCAAGGTTA GAAGATCTTT TCCGTGGTCG
451 TCCTTCGAT ATGCTTGATG CTGCTCTCGC TGATACAGTT GCTAGATAACC
```

## NCED3-P5SM<sub>E/R</sub> gene sequence (AT3G14440.1)

```
1 ATGGCTTCTT TCACGGCAAC GGCTGCGGTT TCTGGGAGAT GGCTTGGTGG
51 CAATCATACT CAGCCGCCAT TATCGTCTTC TCAAAGCTCC GACTTGAGTT
101 ATTGTAGCTC CTTACCTATG GCCAGTCGTG TCACACGTAA GCTCAATGTT
151 TCATCTGCGC TTCACACTCC TCCAGCTCTT CATTTCCTA AGCAATCATC
201 AA ACTCTCCC GCCATTGTTG TTAAGCCCAA AGCCAAAGAA TCCAACACTA
251 AACAGATGAA TTTGTTCCAG AGAGCGGCGG CGGCAGCGTT GGACGCGGCG
301 GAGGGTTTCC TTGTCAGCCA CGAGAAGCTA CACCCGCTTC CTAAAACGGC
351 TGATCCTAGT GTTCAGATCG CCGGAAATTT TGCTCCGGTG AATGAACAGC
401 CCGTCCGGCG TAATCTTCCG GTGGTCGGAA AACTTCCCGA TTCCATCAAAA
451 GGAGTGTATG TGCGCAACGG AGCTAACCCA CTTACAGAGC CGGTGACAGG
501 TCACCACTTC TTCGACGGAG ACGGTATGGT TCACGCCGTC AAATTCGAAC
551 ACGGTT CAGC TAGCTACGCT TGCCGGTTTA CTCAGACTAA CCGGTTTGT
601 CAGGAGGTAG ATTTATGCAT CCTCTTGTC A TGAGAAGTCG AATTGTTCCC
651 ATTCTGTGTG TTGCAGCTAC AGATGGAGAT ACATAGAGAT ACTCGTGGAT
701 TTTGCTTAGT GTT GAGTTTT GTTCTGGTTG TGA ACTAAAA GTTTATACAT
751 TTGCAGGAAA TAAATAGCCT TTTGTTTAAA TCAA AAGGTC TTACCTATGT
801 TATTGCGTGA GGCATTGGAT CCCAAAGAGA GAACTCCAAA ATGCGAGGCT
851 ACATGTTATG GACTAGTATC AGGTTGGGAG ACCTCCTGAG AAGCTCCAGC
901 AAGTAAGCCT CGATCACGCA AAATGTTTGA GGTCTGATGT TCAATAGCTT
951 GTTTTGTTT ACTTTGCTTT GGACTTTCTT TTCGCCAATG AGCTATGTTT
1001 CTGATGGTTT TCACTCTTTT GGTGTGTAGA GACAATTGGG TCGACCGGTT
```

1051 TTCCCCAAAG CCATCGGTGA GCTTCACGGC CACACCGGTA TTGCCCCGACT  
 1101 CATGCTATTC TACGCCAGAG CTGCAGCCGG TATAGTCGAC CCGGCACACG  
 1151 GAACCGGTGT AGCTAACGCC GGTTTGGTCT ATTTCAATGG CCGGTTATTG  
 1201 GCTATGTCGG AGGATGATTT ACCTTACCAA GTTCAGATCA CTCCCAATGG  
 1251 AGATTTAAAA ACCGTTGGTC GGTTTCGATTT TGATGGACAA TTAGAATCCA  
 1301 CAATGATTGC CCACCCGAAA GTCGACCCGG AATCCGGTGA ACTCTTCGCT  
 1351 TTAAGCTACG ACGTCGTTTC AAAGCCTTAC CTAAAATACT TCCGATTCTC  
 1401 ACCGGACGGA ACTAAATCAC CGGACGTCGA GATTCAGCTT GATCAGCCAA  
 1451 CGATGATGCA CGATTTTCGG ATTACAGAGA ACTTCGTCGT CGTACCTGAC  
 1501 CAGCAAGTCG TTTTCAAGCT GCCGGAGATG ATCCGCGGTG GGTCTCCGGT  
 1551 GGTTTACGAC AAGAACAAGG TCGCAAGATT CGGGATTTTA GACAAATACG  
 1601 CCGAAGATTC ATCGAACATT AAGTGGATTG ATGCTCCAGA TTGCTTCTGC  
 1651 TTCCATCTCT GGAACGCTTG GGAAGAGCCA GAAACAGATG AAGTCGTCGT  
 1701 GATAGGGTCC TGTATGACTC CACCAGACTC AATTTTCAAC GAGTCTGACG  
 1751 AGAATCTCAA GAGTGTCTCT TCTGAAATCC GCCTGAATCT CAAAACCGGT  
 1801 GAATCAACTC GCCGTCCGAT CATCTCCAAC GAAGATCAAC AAGTCAACCT  
 1851 CGAAGCAGGG ATGGTCAACA GAAACATGCT CGGCCGTAAA ACCAAATTCG  
 1901 CTTACTTGGC TTTAGCCGAG CCGTGGCCTA AAGTCTCAGG ATTCGCTAAA  
 1951 GTTGATCTCA CTACTGGAGA AGTTAAGAAA CATCTTTACG GCGATAACCG  
 2001 TTACGGAGGA GAGCCTCTGT TTCTCCCGG AGAAGGAGGA GAGGAAGACG  
 2051 AAGGATACAT CCTCTGTTTC GTTCACGACG AGAAGACATG GAAATCGGAG  
 2101 TTACAGATAG TTAACGCCGT TAGCTTAGAG GTTGAAGCAA CGGTTAAACT  
 2151 TCCGTCAAGG GTTCCGTACG GATTTACGG TACATTCATC GGAGCCGATG  
 2201 ATTTGGCGAA GCAGGTCGTG TGA

### NCED3-P5SM<sub>E/R</sub> SPLICED PRODUCT I

1 AACTTCCCGA TTCCATCAAA GGAGTGTATG TCGCAACCG AGCTAACCCA  
 51 CTTCACGAGC CGGTGACAGG TCACCACTTC TTCGACGGAG ACGGTATGGT  
 101 TCACGCCGTC AAATTCTGAAC ACGGTTTCAGC TAGCTACGCT TGCCGGTTTA  
 151 CTCAGACTAA CCGGTTTGTG CAGGAGAGAC AATTGGGTCG ACCGGTTTTC  
 201 CCCAAAGCCA TCGGTGAGCT TCACGGCCAC ACCGGTATTG CCCGACTCAT  
 251 GCTATTCTAC GCCAGAGCTG CAGCCGGTAT AGTCGACCCG GCACACGGAA  
 301 CCGGTGTAGC TAACGCCGGT TTGGTCTATT TCAATGGCCG GTTATTGGCT

### NCED3-P5SM<sub>E/R</sub> SPLICED PRODUCT II

1 AACTTCCCGA TTCCATCAAA GAGTGTATG TCGCAACCG AGCTAACCCA  
 51 CTTCACGAGC CGGTGACAGG CACCACTTC TTCGACGGAG ACGGTATGGT  
 101 TCACGCCGTC AAATTCTGAACA CCGTTCAGC TAGCTACGCT TGCCGGTTTA  
 151 CTCAGACTAA CCGGTTTGTTC AGGAGGAAA TAAATAGCCT TTTGTTTAAA  
 201 TCAAAAGGTC TTACCTATGTT ATTGCGTGA GGCATTGGAT CCCAAAGAGA  
 251 GAACTCCAAA ATGCGAGGCTA CATGTTATG GACTAGTATC AGGTGTTGGAG  
 301 ACCTCCTGAG AAGCTCCAGCA AGTAAGCCT CGATCACGCA AAATGTTTGA  
 351 GAGCAATTG GGTGACCGGT TTTCCCAA AGCCATCGGT GAGCTTCACG

401 GCCACACCGG TATTGCCCGAC TCATGCTAT TCTACGCCAG AGCTGCAGCC  
 451 GGTATAGTCG ACCCGGCACAC GGAACCGGT GTAGCTAACG CCGGTTTGGT  
 501 CTATTTCAAT GCGCGTTATT GGCTATGTC GGAGGATGAT TTACCTTACC

### NCED3-P5SM<sub>E/R</sub> SPLICED PRODUCT VI

1 AACTTCCCGA TTCCATCAAA GGAGTGTATG TCGCAACGG AGCTAACCCA  
 51 CTTCACGAGC CGGTGACAGG TCACCACTTC TTCGACGGAG ACGGTATGGT  
 101 TCACGCCGTC AAATTGGAAC ACGGTTGAGC TAGCTACGCT TGCCGGTTTA  
 151 CTCAGACTAA CCGGTTTGGT CAGGAGGAAA TAAATAGCCT TTTGTTTAAA  
 201 TCAAAGGTC TTACCTATGT TATTGCGTGA GGCATTGGAT CCCAAAGAGA  
 251 GAACTCCAAA ATGCGAGGCT ACATGTTATG GACTAGTATC AGGTGGGGAG  
 301 ACCTCCTGAG AAGCTCCAGC AAGTAAGCCT CGATCACGCA AAATGTTTGA  
 351 GGTCTGATGT TCAATAGCTT GTTTTGTTTC ACTTTGCTTT GGACTTTCTT  
 401 TTCGCCAATG AGCTATGTTT CTGATGGTTT TCACTCTTTT GGTGTGTAGA  
 451 GACAATTGGG TCGACCGGTT TTCCCCAAG CCATCGGTGA GCTTCACGGC  
 501 CACACCGGTA TTGCCCGACT CATGCTATTC TACGCCAGAG CTGCAGCCGG  
 551 TATAGTCGAC CCGGCACACG GAACCGGTGT AGCTAACGCC GGTGGGTCT  
 601 ATTTCAATGG CCGGTTATTG GCTATGTCGG AGGATGATTT ACCTTACCAA

### CYP707A2-P5SM<sub>E/R</sub> gene sequence (AT2G29090.1)

1 ATGCAAATCT CATCTTCATC GTCTTCAAAT TTCTTCTCTT CTCTTTATGC  
 51 TGATGAACCG GCACTAATCA CATTAAACAAT TGTTGTAGTA GTAGTAGTGT  
 101 TACTATTTAA ATGGTGGTTG CACTGGAAAG AGCAAAGACT ACGGCTACCT  
 151 CCTGGCTCCA TGGGGTTGCC TTACATCGGA GAGACACTCC GCCTCTACAC  
 201 AGAAAATCCC AATTCCTTCT TCGCCACTCG CCAAACAAG TACGGGGATA  
 251 TATTCAAGAC GCACATATTA GGATGTCCAT GTGTGATGAT AAGTAGTCCA  
 301 GAGGCGGCTC GAATGGTGTT AGTGAGCAAA GCTCACTTGT TCAAGCCAAC  
 351 TTATCCTCCA AGCAAAGAGG TAGATTTATG CATCCTCTTG TCATGAGAAG  
 401 TCGAATTGTT CCCATTCTGT GTGTTGCAGC TACAGATGGA GATACATAGA  
 451 GATACTCGTG GATTTTGCTT AGTGTGAGT TTTGTTCTGG TTGTGAACTA  
 501 AAAGTTTATA CATTTCAGG AAATAAATAG CCTTTTGTGT AAATCAAAG  
 551 GTCTTACCTA TGTTATTGCG TGAAGCATTG GATCCCAAAG AGAGAACTCC  
 601 AAAATGCGAG GCTACATGTT ATGGACTAGT ATCAGGTTGG GAGACCTCCT  
 651 GAGAAGCTCC AGCAAGTAAG CCTCGATCAC GCAAATGTT TGAGGTCTGA  
 701 TGTTCAATAG CTTGTTTTGT TTCACTTTGC TTTGGACTTT CTTTTCGCCA  
 751 ATGAGCTATG TTTCTGATGG TTTTCACTCT TTTGGTGTGT AGAGAATGAT  
 801 TGGACCAGAG GCTCTTTTCT TCCACCAAGG TCCATACCAT TCTACCCTTA  
 851 AGCGGCTGGT CCAGTCTTCT TTCATGCCTT CTGCTCTCAG ACCAACCGTC  
 901 TCTCACATCG AGCTCCTTGT CCTCCAAACC CTTTCTCTT GGACGTCCCA  
 951 AAAGTCCATC AACACCCTCG AATACATGAA ACGATATGCA TTCGATGTGG  
 1001 CGATCATGTC AGCGTTCGGG GACAAAGAGG AGCCCACTAC GATTGATGTT  
 1051 ATTAAGCTTC TCTATCAACG TCTCGAAAGG GGTTACAAC CCATGCCTCT  
 1101 CGACCTACCG GGCACACTTT TTCATAAGTC CATGAAGGCA AGAATAGAA

1151 TAAGCGAGGA ACTAAGGAAA GTAATAGAGA AGAGAAGAGA GAATGGGAGA  
 1201 GAAGAAGGAG GACTATTGGG AGTACTTCTG GGAGCAAAGG ATCAAAAACG  
 1251 CAACGGCTTA AGTGATTCAC AGATTGCTGA CAACATCATC GGTGTTATAT  
 1301 TCGCCGCCAC CGACACCACC GCTTCTGTCT TAACTTGGCT TCTCAAGTAC  
 1351 TTACACGACC ACCCCAATCT CCTCCAAGAA GTCTCCAGGG AGCAATTCAG  
 1401 CATTGACAG AAAATAAAAA AAGAAAACCG AAGAATCTCA TGGGAAGATA  
 1451 CAAGAAAAAT GCCACTGACC ACTAGGGTGA TACAAGAGAC ACTAAGAGCA  
 1501 GCAAGTGTAC TGTCCTTTAC ATTTAGAGAA GCAGTACAAG ACGTCGAATA  
 1551 TGATGGCTAC TTGATCCCAA AGGGTTGGAA GGTCTTCTCT CTTTCCGGC  
 1601 GAATCCATCA CTCCTCCGAA TTCTTCCCG ATCCTGAAAA ATTCGATCCT  
 1651 TCTAGATTCG AGGTGGCACC AAAACCTTAC ACGTACATGC CATTCCGAAA  
 1701 TGGAGTGCAC TCATGTCCAG GAAGTGAGCT GGCTAAACTT GAGATGCTTA  
 1751 TCCTCCTTCA CCACCTCACT ACTTCCTTCA GATGGGAAGT GATTGGAGAT  
 1801 GAAGAAGGTA TACAGTATGG TCCTTCCCT GTACCCAAGA AGGGTTTACC  
 1851 AATAAGAGTA ACCCCGATT T AA

### CYP707A2-P5SM<sub>E/R</sub> SPLICED PRODUCT I

1 ACACTCCGCC TCTACACAGA AAATCCCAAT TCCTTCTTCG CCACTCGCCA  
 51 AAACAAGTAC GGGGATATAT TCAAGACGCA CATATTAGGA TGTCCATGTG  
 101 TGATGATAAG TAGTCCAGAG GCGGCTCGAA TGGTGTTAGT GAGCAAAGCT  
 151 CACTTGTTCA AGCCAACCTA TCCTCCAAGC AAAGAGAGAA TGATTGGACC  
 201 AGAGGCTCTT TTCTTCCACC AAGGTCCATA CCATTCTACC CTTAAGCGGC  
 251 TGGTCCAGTC TTCTTTCATG CCTTCTGCTC TCAGACCAAC CGTCTCTCAC  
 301 ATCGAGCTCC TTGTCCTCCA AACCCTTTC TCTTGGACGT CCCAAAAGTC  
 351 CATCAACACC CTCGAATACA TGAAACGATA TGCATTTCGAT GTGGCGATCA

### CYP707A2-P5SM<sub>E/R</sub> SPLICED PRODUCT II

1 ACACTCCGCC TCTACACAGA AAATCCCAAT TCCTTCTTCG CCACTCGCCA  
 51 AAACAAGTAC GGGGATATAT TCAAGACGCA CATATTAGGA TGTCCATGTG  
 101 TGATGATAAG TAGTCCAGAG GCGGCTCGAA TGGTGTTAGT GAGCAAAGCT  
 151 CACTTGTTCA AGCCAACCTA TCCTCCAAGC AAAGAGGAAA TAAATAGCCT  
 201 TTTGTTTAAA TCAAAAGGTC TTACCTATGT TATTGCGTGA GGCATTGGAT  
 251 CCCAAAGAGA GAACTCCAAA ATGCGAGGCT ACATGTTATG GACTAGTATC  
 301 AGGTTGGGAG ACCTCCTGAG AAGCTCCAGC AAGTAAGCCT CGATCACGCA  
 351 AAATGTTTGA GAGATGATT GGACCAGAGG CTCTTTTCTT CCACCAAGGT  
 401 CCATACCATT CTACCCTTAA GCGGCTGGTC CAGTCTTCTT TCATGCCTTC  
 451 TGCTCTCAGA CCAACCGTCT CTCACATCGA GTCCTTGTC CTCCAAACCC  
 501 TTTCTCTTG GACGTCCCAA AAGTCCATCA ACACCCTCGA ATACATGAAA

### CYP707A2-P5SM<sub>E/R</sub> SPLICED PRODUCT VI

1 ACACTCCGCC TCTACACAGA AAATCCCAA TTCCTTCTTCG CCACTCGCCA  
 51 AAACAAGTAC GGGGATATAT TCAAGACGC ACATATTAGGA TGTCCATGTG



101 TGATGATAAG TAGTCCAGAG GCGGCTCGA ATGGTGTAGT GAGCAAAGCT  
 151 CACTTGTTCA AGCCAACCTA TCCTCCAAG CAAAGAGGAAA TAAATAGCCT  
 201 TTTGTTTAAA TCAAAAGGTC TTACCTATGT TATTGCGTGA GGCATTGGAT  
 251 CCCAAAGAGA GAACTCCAAA ATGCGAGGCT ACATGTTATG GACTAGTATC  
 301 AGGTTGGGAG ACCTCCTGAG AAGCTCCAGC AAGTAAGCCT CGATCACGCA  
 351 AAATGTTTGA GGTCTGATGT TCAATAGCTT GTTTTGTTC ACTTTGCTTT  
 401 GGACTTTCTT TTCGCCAATG AGCTATGTTT CTGATGGTTT TCACTCTTTT  
 451 GGTGTGTAGA GAATGATTGG ACCAGAGGCT CTTTTCTTCC ACCAAGGTCC  
 501 ATACCATTCT ACCCTTAAGC GGCTGGTCCA GTCTTCTTTC ATGCCTTCTG  
 551 CTCTCAGACC AACCGTCTCT CACATCGAGC TCCTTGTCTT CCAAACCCTT  
 601 TCCTCTTGA CGTCCCAAAA GTCCATCAAC ACCCTCGAAT ACATGAAACG

**CYP707A3-P5SM<sub>E/R</sub> gene sequence (AT5G45340.1)**

1 ATGGATTTCT CCGGTTTGTT TCTCACTCTC TCCGCGGCGG CTCTGTTTCT  
 51 CTGTTTACTC CGATTTATCG CCGGAGTCCG CCGTAGCTCC TCCACGAAAC  
 101 TCCCTCTTCC TCCGGGAACA ATGGGTTATC CTTACGTCGG CGAAACATTC  
 151 CAACTTTACT CACAAGACCC TAATGTGTTT TTTGCAGCAA AACAGAGAAG  
 201 ATACGGATCG GTGTTCAAGA CTCATGTATT GGGATGTCCA TGTGTGATGA  
 251 TCTCGAGCCC TGAAGCAGCG AAATTCGTAT TGGTTACAAA GTCTCATTTG  
 301 TTTAAACCGA CTTTTCCGGC CAGTAAAGAG GTAGATTTAT GCATCCTCTT  
 351 GTCATGAGAA GTCGAATTGT TCCCATTCTG TGTGTTGCAG CTACAGATGG  
 401 AGATACATAG AGATACTCGT GGATTTTGCT TAGTGTTGAG TTTTGTCTG  
 451 GTTGTGAACT AAAAGTTTAT ACATTTGCAG GAAATAAATA GCCTTTTGTT  
 501 TAAATCAAAA GGTCTTACCT ATGTTATTGC GTGAGGCATT GGATCCCAAA  
 551 GAGAGAACTC CAAAATGCGA GGCTACATGT TATGGACTAG TATCAGGTTG  
 601 GGAGACCTCC TGAGAAGCTC CAGCAAGTAA GCCTCGATCA CGCAAAATGT  
 651 TTGAGGCTCTG ATGTTCAATA GCTTGTTTTG TTTCACTTTG CTTTGGACTT  
 701 TCTTTTCGCC AATGAGCTAT GTTTCTGATG GTTTTCACTC TTTTGGTGTG  
 751 TAGAGAATGC TTGAAAACA AGCCATCTTC TTCCATCAAG GAGATTATCA  
 801 TTCCAAACTT AGAAAGCTTG TTTAAGAGC TTTCATGCCT GATGCAATCA  
 851 GAAACATGGT CCCTCACATT GAATCAATTG CTCAAGAATC ACTCAATTCT  
 901 TGGGATGGAA CTCAACTCAA CACTTACCAG GAAATGAAAA CATACTTTT  
 951 CAATGTTGCG TTAATCTCAA TACTCGGCAA AGACGAAGTT TATTACCGAG  
 1001 AAGATCTAAA ACGATGCTAC TACATTCTAG AGAAAGGTTA CAATTCGATG  
 1051 CCGATTAATC TTCCAGGAAC ATTATTCCAC AAAGCCATGA AAGCTCGCAA  
 1101 GGAGCTAGCT CAAATCCTCG CTAACATCTT ATCCAAAAGA AGACAAAACC  
 1151 CATCATCACA CACAGATCTC CTCGGATCAT TCATGGAAGA CAAAGCAGGA  
 1201 TTAACCGACG AACAAATCGC CGATAACATC ATCGGAGTAA TCTTCGCCGC  
 1251 AAGAGACACG ACGGCGAGTG TTCTGACGTG GATCCTCAAG TACTTAGCTG  
 1301 ATAATCCAAC TGTTCTAGAA GCTGTCACTG AAGAGCAAAT GGCAATAAGG  
 1351 AAAGATAAAA AAGAAGGAGA GAGTCTCACT TGGGAAGATA CAAAGAAGAT  
 1401 GCCATTAACT TATAGAGTAA TCCAAGAGAC ATTAAGAGCT GCTACAATCT  
 1451 TATCTTTCAC ATTTAGAGAA GCTGTCGAAG ATGTCGAATA CGAAGGATAT  
 1501 TTGATACCAA AGGGATGGAA AGTACTGCCA CTATTCAGAA ATATTCATCA  
 1551 CAATGCTGAT ATATTTTCGG ATCCGGGGAA ATTCGATCCG TCGAGATTCTG

1601 AAGTTGCGCC GAAACCGAAT ACATTCATGC CTTTGGTAG TGGGATTCAT  
 1651 TCTTGTCAG GCAATGAGTT AGCTAAACTT GAAATCTCTG TTCTAATCCA  
 1701 TCATCTCACC ACTAAGTACA GATGGTCAAT CGTAGGGCCT AGCGATGGAA  
 1751 TTCAGTATGG GCCGTTCGCT CTTCTCAGA ATGGATTGCC TATTGCCTTG  
 1801 GAACGAAAAC CATAG

### CYP707A3-P5SM<sub>E/R</sub> SPLICED PRODUCT I

1 ACCCTAATGT GTTCTTTGCA GCAAACAGA GAAGATACGG ATCGGTGTTC  
 51 AAGACTCATG TATTGGGATG TCCATGTGTG ATGATCTCGA GCCCTGAAGC  
 101 AGCGAAATTC GTATTGGTTA CAAAGTCTCA TTTGTTTAAA CCGACTTTTC  
 151 CGGCCAGTAA AGAGAGATG CTTGGAAAAC AAGCCATCTT CTTCCATCAA  
 201 GGAGATTATC ATTCCAAACT TAGAAAGCTT GTTTTAAGAG CTTTCATGCC  
 251 TGATGCAATC AGAAACATGG TCCCTCACAT TGAATCAATT GCTCAAGAAT  
 301 CACTCAATTC TTGGGATGGA ACTCAACTCA ACACTTACCA GGAAATGAAA

### CYP707A3-P5SM<sub>E/R</sub> SPLICED PRODUCT II

1 ACCCTAATGT GTTCTTTGCA GCAAACAGA GAAGATACGG ATCGGTGTTC  
 51 AAGACTCATG TATTGGGATG TCCATGTGTG ATGATCTCGA GCCCTGAAGC  
 101 AGCGAAATTC GTATTGGTTA CAAAGTCTCA TTTGTTTAAA CCGACTTTTC  
 151 CGGCCAGTAA AGAGGAAATA AATAGCCTTT TGTTTAAATC AAAAGGTCTT  
 201 ACCTATGTTA TTGCGTGAGG CATTGGATCC CAAAGAGAGA ACTCCAAAAT  
 251 GCGAGGCTAC ATGTTATGGA CTAGTATCAG GTTGGGAGAC CTCCTGAGAA  
 301 GCTCCAGCAA GTAAGCCTCG ATCACGCAA ATGTTTGAG A GAATGCTTGG  
 351 AAAACAAGCC ATCTTCTTCC ATCAAGGAGA TTATCATTCC AAACCTAGAA  
 401 AGCTTGTTTT AAGAGCTTTC ATGCCTGATG CAATCAGAAA CATGGTCCCT  
 451 CACATTGAAT CAATTGCTCA AGAATCACTC AATTCTTGGG ATGGAACTCA  
 501 ACTCAACACT TACCAGGAAA TGAAAACATA CACTTTCAAT GTTGC GTTAA

## SUPPLEMENTARY TABLE 1. Sequences of DNA primers

### LEGEND:

lowercase = random nucleotides

**lowercase bold** = restriction site

UPPERCASE = primer sequence

**UPPERCASE BOLD ITALICS** = overlap with P5SM

| NAME         | EXPERIMENT                                                                           | RE USED    |
|--------------|--------------------------------------------------------------------------------------|------------|
|              | <b>RT-PCR analysis</b>                                                               |            |
|              | <b>TFIIIA-eGFP</b>                                                                   |            |
| <b>DNA1</b>  | 5' - atgc <b>ggatcc</b> GTGCGCGTCTTGATGGA                                            | For, BamHI |
| <b>DNA2</b>  | 5' - agct <b>tctaga</b> ATCCACATAGCAAGTAAAAGA                                        | Rev, XbaI  |
|              | <b>eGFP-P5SM<sub>E/R</sub>; eGFP-OsP5SM<sub>E/R</sub>; eGFP-HyP5SM<sub>E/R</sub></b> |            |
| <b>DNA3</b>  | 5' - CACCCTGACCTACGGCGT                                                              | For        |
| <b>DNA4</b>  | 5' - CGATGCCCTTCAGCTCG                                                               | Rev        |
|              | <b>fLUC-P5SM<sub>E/R</sub></b>                                                       |            |
| <b>DNA5</b>  | 5' - GACATCACTTACGCTGAGTACT                                                          | For        |
| <b>DNA6</b>  | 5' - TGCAACCCCTTTTTGGAAAC                                                            | Rev        |
|              | <b>fLUC-P5SM<sub>K/R</sub></b>                                                       |            |
| <b>DNA7</b>  | 5' - CATAAAGAAAGGCCCGGC                                                              | For        |
| <b>DNA8</b>  | 5' - ACTGCAACTCCGATAAATAACG                                                          | Rev        |
|              | <b>CYP707A3-P5SM<sub>E/R</sub></b>                                                   |            |
| <b>DNA9</b>  | 5' - ACCCTAATGTGTTCTTTGCAGCAA                                                        | For        |
| <b>DNA10</b> | 5' - TTGAGTTCCATCCCAAGAATTGA                                                         | Rev        |
|              | <b>CYP707A3-P5SM<sub>E/S</sub></b>                                                   |            |
| <b>DNA11</b> | 5' - GATGATCTCGAGCCCTGAAG                                                            | For        |
| <b>DNA12</b> | 5' - AACCTTTCTCTAGAATGTAGTAGCA                                                       | Rev        |
|              | <b>CYP707A3-P5SM<sub>K/R</sub></b>                                                   |            |
| <b>DNA13</b> | 5' - TGCCTGATGCAATCAGAAACATGGT                                                       | For        |
| <b>DNA14</b> | 5' - AGGAGATCTGTGTGTGATGATGGGT                                                       | Rev        |
|              | <b>PSY-P5SM<sub>E/R</sub>; PSY-P5SM<sub>C/R</sub></b>                                |            |
| <b>DNA15</b> | 5' - CTTGATGTGAAGAAACCACAAGATG                                                       | For        |
| <b>DNA16</b> | 5' - AAGCATATCGAAAGGACGACCA                                                          | Rev        |
|              | <b>NCED3-P5SM<sub>E/R</sub></b>                                                      |            |
| <b>DNA17</b> | 5' - AACTTCCCGATTCCATCAAAGG                                                          | For        |
| <b>DNA18</b> | 5' - AAATAGACCAAACCGCGTTAG                                                           | Rev        |
|              | <b>CYP707A2-P5SM<sub>E/R</sub></b>                                                   |            |
| <b>DNA19</b> | 5' - ACACTCCGCCTCTACACAGAAAAT                                                        | For        |
| <b>DNA20</b> | 5' - TTTCATGTATTCGAGGGTGTTGAT                                                        | Rev        |
|              | <b>qRT-PCR analysis</b>                                                              |            |
|              | <b>eGFP-P5SM<sub>E/R</sub> transcripts retaining exon (SP-II)</b>                    |            |
| <b>DNA21</b> | 5' - CGTCCAGGAGAGAACCATCTTC                                                          | For        |
| <b>DNA22</b> | 5' - CTGCTTGTCGGCCATGATATAG                                                          | Rev        |
|              | <b>eGFP-P5SM<sub>E/R</sub> transcripts skipping exon (SP-I)</b>                      |            |
| <b>DNA23</b> | 5' - CGTCCAGGAGGAAATAAATAGCC                                                         | For        |
| <b>DNA24</b> | 5' - CTTGAAGAAGATGGTTCTCTCAAACA                                                      | Rev        |

|       |  |                                                                                       |            |
|-------|--|---------------------------------------------------------------------------------------|------------|
|       |  | <b>fLUC-P5SM<sub>ER</sub> transcripts retaining exon (SP-II)</b>                      |            |
| DNA5  |  | 5' - GACATCACTTACGCTGAGTACT                                                           | For        |
| DNA25 |  | 5' - GGCTATTTATTTTCCTCATTATAAAATGTC                                                   | Rev        |
| DNA26 |  | 5' - CGACATTTATAATGAGGAAATAAATAGCC                                                    | For2       |
| DNA27 |  | 5' - CAATTCTCTCTCAAACATTTTGCG                                                         | Rev2       |
| DNA28 |  | 5' - CAAAATGTTTGAGAGAGAATTGCTC                                                        | For3       |
| DNA29 |  | 5' - GAGGTAGATGAGATGTGACGA                                                            | Rev3       |
|       |  | <b>fLUC-P5SM<sub>ER</sub> transcripts skipping exon (SP-I)</b>                        |            |
| DNA5  |  | 5' - GACATCACTTACGCTGAGTACT                                                           | For        |
| DNA30 |  | 5' - TTGAGCAATTCTCTCATTATAAAATG                                                       | Rev        |
| DNA31 |  | 5' - CGACATTTATAATGAGAGAGAATTGC                                                       | For2       |
| DNA32 |  | 5' - GTAGATGAGATGTGACGAACGT                                                           | Rev2       |
|       |  | <b>fLUC-P5SM<sub>KR</sub> transcripts retaining exon (SP-II)</b>                      |            |
| DNA7  |  | 5' - CATAAAGAAAGGCCCGGC                                                               | For        |
| DNA33 |  | 5' - GGCTATTTATTTTCCTTCATAGCTTCT                                                      | Rev        |
|       |  | <b>fLUC-P5SM<sub>KR</sub> transcripts skipping exon (SP-I)</b>                        |            |
| DNA7  |  | 5' - CATAAAGAAAGGCCCGGC                                                               | For        |
| DNA34 |  | 5' - CAGCCCATATCTCTTCATAGCTT                                                          | Rev        |
|       |  | <b>DsRED transcripts (reference)</b>                                                  |            |
| DNA35 |  | 5' - CCGAGAACGTCATCACCG                                                               | For        |
| DNA36 |  | 5' - CTTGGAGCCGTACTGGAACGT                                                            | Rev        |
|       |  |                                                                                       |            |
|       |  | <b>Cloning of reporter constructs</b>                                                 |            |
|       |  | <b>P5SM insert</b>                                                                    |            |
| DNA37 |  | 5' - GTAGATTTATGCATCCTCTTGTCATGAG                                                     | For        |
| DNA38 |  | 5' - CTACACACCAAAAGAGTGAAAACCAT                                                       | Rev        |
|       |  | <b>eGFP-P5SM<sub>ER</sub> 3-piece ligation</b>                                        |            |
| DNA39 |  | 5' - gacagatctATGTCTAGAGTGAGCAAGGGCG (5' - eGFP)                                      | For, BgIII |
| DNA40 |  | 5' - CTCATGACAAGAGGATGCATAAAATCTACCTCCTGGACGTAGCCTTCGG<br>(5' - P5SM overlap)         | Rev        |
| DNA41 |  | 5' - ATGGTTTTCACTCTTTTGGTGTGTAGAGAACCATCTTCTTCAAGGACGAC<br>(3' - P5SM overlap)        | For        |
| DNA42 |  | 5' - gacgtcgcacTTACTTGTACAGCTCGTCCATGC (3' - eGFP)                                    | Rev, Sall  |
|       |  | <b>fLUC-P5SM<sub>ER</sub> 3-piece ligation</b>                                        |            |
| DNA43 |  | 5' - acgtagatctATGGAAGACGCCAAAAACATAA (5' - fLUC)                                     | For, BgIII |
| DNA44 |  | 5' -<br>CTCATGACAAGAGGATGCATAAAATCTACCTCATTATAAAATGTCGTTTCGCGG<br>(5' - P5SM overlap) | Rev        |
| DNA45 |  | 5' - ATGGTTTTCACTCTTTTGGTGTGTAGAGAGAATTGCTCAACAGTATGGGC<br>(3' - P5SM overlap)        | For        |
| DNA46 |  | 5' - acgtgctgcacTTACACGGCGATCTTTCCG (3' - fLUC)                                       | Rev, Sall  |
|       |  | <b>fLUC-P5SM<sub>KR</sub> 3-piece ligation</b>                                        |            |
| DNA43 |  | 5' - acgtagatctATGGAAGACGCCAAAAACATAA (5' - fLUC)                                     | For, BgIII |
| DNA47 |  | 5' - CTCATGACAAGAGGATGCATAAAATCTACCTTCATAGCTTCTGCCAACCG<br>(5' - P5SM overlap)        | Rev        |
| DNA48 |  | 5' -<br>ATGGTTTTCACTCTTTTGGTGTGTAGAGATATGGGCTGAATACAAATCACAG<br>(3' - P5SM overlap)   | For        |
| DNA46 |  | 5' - acgtgctgcacTTACACGGCGATCTTTCCG (3' - fLUC)                                       | Rev, Sall  |

|              |  |                                                                                                    |            |
|--------------|--|----------------------------------------------------------------------------------------------------|------------|
|              |  | <b>NCED3-P5SM<sub>E/R</sub> 3-piece ligation</b>                                                   |            |
| <b>DNA49</b> |  | 5'- tgatagatctATGGCTTCTTTCACGGCAAC (5'- NCED3)                                                     | For, BgIII |
| <b>DNA50</b> |  | 5'-<br><i>CTCATGACAAGAGGATGCATAAATCTAC</i> CTCCTGAACAAACCGGTTAGTCTG<br>(5'- P5SM overlap)          | Rev        |
| <b>DNA51</b> |  | 5'- <i>ATGGTTTTCACTCTTTTGGTGTGTAG</i> AGACAATTGGGTCGACCGGTTT<br>(3'- P5SM overlap)                 | For        |
| <b>DNA52</b> |  | 5'- atcactcgagGAACTCACACGACCTGCTTCG (3'- NCED3)                                                    | Rev, XhoI  |
|              |  | <b>CYP707A3-P5SM<sub>E/R</sub> 3-piece ligation</b>                                                |            |
| <b>DNA53</b> |  | 5'- tgattgatcaATGGATTTCTCCGGTTTGTTTC (5'-CYP707A3)                                                 | For, BclI  |
| <b>DNA54</b> |  | 5'- <i>CTCATGACAAGAGGATGCATAAATCTAC</i> CTCTTTACTGGCCGAAAAGTC<br>(5'- P5SM overlap)                | Rev        |
| <b>DNA55</b> |  | 5'- <i>ATGGTTTTCACTCTTTTGGTGTGTAG</i> AGAATGCTTGGAACAAGCC<br>(3'- P5SM overlap)                    | For        |
| <b>DNA56</b> |  | 5'- atcagtcgacCTATGGTTTTCGTTCCAAGGC (3'- CYP707A3)                                                 | Rev, Sall  |
|              |  | <b>CYP707A2-P5SM<sub>E/R</sub> 3-piece ligation</b>                                                |            |
| <b>DNA57</b> |  | 5'- tgatagatctATGCAAATCTCATCTTCATCGTC (5'- CYP707A2)                                               | For, BgIII |
| <b>DNA58</b> |  | 5'-<br><i>CTCATGACAAGAGGATGCATAAATCTAC</i> CTCTTTGCTTGAGGATAAGTTGG<br>(5'- P5SM overlap)           | Rev        |
| <b>DNA59</b> |  | 5'- <i>ATGGTTTTCACTCTTTTGGTGTGTAG</i> AGAATGATTGGACCAGAGGCTC<br>(3'- P5SM overlap)                 | For        |
| <b>DNA60</b> |  | 5'- atcagtcgacCTTAAATCGGGGTACTCTTATTGG (3'- CYP707A2)                                              | Rev, Sall  |
|              |  | <b>PSY-P5SM<sub>E/R</sub> 3-piece ligation</b>                                                     |            |
| <b>DNA61</b> |  | 5'- tgattgatcaATGTCTTCTTCTGTAGCAGTGTATGG (5'- PSY)                                                 | For, BclI  |
| <b>DNA62</b> |  | 5'-<br><i>CTCATGACAAGAGGATGCATAAATCTAC</i> CTCGGGTGCATAAGCAAAGTTC<br>(5'- P5SM overlap)            | Rev        |
| <b>DNA63</b> |  | 5'- <i>ATGGTTTTCACTCTTTTGGTGTGTAG</i> AGACGAAAGGCGATTTGGG (3'-<br>P5SM overlap)                    | For        |
| <b>DNA64</b> |  | 5'- atcagtcgacCGCTCTCATATCGATAGTCTTGAAC (3'- PSY)                                                  | Rev, Sall  |
|              |  | <b>CYP707A3-P5SM<sub>E/S</sub> 3-piece ligation</b>                                                |            |
| <b>DNA53</b> |  | 5'- tgattgatcaATGGATTTCTCCGGTTTGTTTC (5'-CYP707A3)                                                 | For, BclI  |
| <b>DNA65</b> |  | 5'-<br><i>CTCATGACAAGAGGATGCATAAATCTAC</i> CTCAATGTGAGGGACCATGTTTCTGA<br>TTGC (5'- P5SM overlap)   | Rev        |
| <b>DNA66</b> |  | 5'-<br><i>ATGGTTTTCACTCTTTTGGTGTGTAG</i> AGTATTGCTCAAGAATCACTCAATTCTT<br>GGGAT (3'- P5SM overlap)  | For        |
| <b>DNA56</b> |  | 5'- atcagtcgacCTATGGTTTTCGTTCCAAGGC (3'- CYP707A3)                                                 | Rev, Sall  |
|              |  | <b>CYP707A3-P5SM<sub>K/R</sub> 3-piece ligation</b>                                                |            |
| <b>DNA53</b> |  | 5'- tgattgatcaATGGATTTCTCCGGTTTGTTTC (5'-CYP707A3)                                                 | For, BclI  |
| <b>DNA67</b> |  | 5'-<br><i>CTCATGACAAGAGGATGCATAAATCTAC</i> CTTTAGATCTTCTCGGTAATAAACTT<br>CGTCTT (5'- P5SM overlap) | Rev        |
| <b>DNA68</b> |  | 5'-<br><i>ATGGTTTTCACTCTTTTGGTGTGTAG</i> AGATGCTACTACATTCTAGAGAAAGGTT<br>ACAATT (3'-P5SM overlap)  | For        |
| <b>DNA56</b> |  | 5'- atcagtcgacCTATGGTTTTCGTTCCAAGGC (3'- CYP707A3)                                                 | Rev, Sall  |
|              |  | <b>PSY-P5SM<sub>C/R</sub> 3-piece ligation</b>                                                     |            |

|       |                                                                                                 |            |
|-------|-------------------------------------------------------------------------------------------------|------------|
| DNA61 | 5'- tgattgatcaATGTCTTCTTCTGTAGCAGTGTTATGG (5'- PSY)                                             | For, BclI  |
| DNA69 | 5'- CTCATGACAAGAGGATGCATAAATCTACGCACCAAACGTAGATTGCCCA (5'- P5SM overlap)                        | Rev        |
| DNA70 | 5'- ATGGTTTTCACTCTTTTGGTGTGTAGAGAAGAAGTATGAACTTGTGGAT (3'- P5SM overlap)                        | For        |
| DNA64 | 5'- atcagtcgacCGCTCTCATATCGATAGTCTTGAAC (3'- PSY)                                               | Rev, Sall  |
|       | <b>eGFP- OsP5SM 3-piece ligation</b>                                                            |            |
| DNA39 | 5'- gacagatctATGTCTAGAGTGAGCAAGGGCG (5'- eGFP)                                                  | For, BglII |
|       | 5'-<br>TGGGATCCAATGCTTCACACTAACATAGGTAAGACCTTTTGATTTAAACAAAAG (overhang 5'- P5SM and OsP5SM P1) | Rev        |
| DNA71 | 5'- GTGTGAAGCATTGGATCCCA (OsP5SM P1 insert)                                                     | For        |
| DNA72 | 5'- GCGTGAGGAGGCAATCCTG (OsP5SM P1 insert)                                                      | Rev        |
| DNA73 | 5'- CAGGATTGCCTCCTCACGCAATGTTTGGTCTGTATGTTCAATAGC (overhang 3'- P5SM and OsP5SM P1)             | For        |
| DNA42 | 5'- gacgtcgacTTACTTGTACAGCTCGTCCATGC (3'- eGFP)                                                 | Rev, Sall  |
|       | <b>eGFP- HyP5SM 3-piece ligation</b>                                                            |            |
| DNA39 | 5'- gacagatctATGTCTAGAGTGAGCAAGGGCG (5'- eGFP)                                                  | For, BglII |
| DNA74 | 5'- TTTTGGAGTTCTCTTTGGGATCCAA (OsP5SM L2 mutation)                                              | Rev        |
| DNA75 | 5'- GGCATTGGATCCCAAAGAGAGAACTC (OsP5SM L2 mutation)                                             | For        |
| DNA42 | 5'- gacgtcgacTTACTTGTACAGCTCGTCCATGC (3'- eGFP)                                                 | Rev, Sall  |
|       | <b>P5SM mutant constructs by QuikChange mutagenesis</b>                                         |            |
|       | <b>M1</b>                                                                                       |            |
| DNA76 | 5'- TATGCAGAGTCATTCGCTCAAGGTAGATTTATGCATCCTCTTG                                                 | For        |
| DNA77 | 5'- CAAGAGGATGCATAAATCTACCTTGAGCGAATGACTCTGCATA                                                 | Rev        |
|       | <b>M2</b>                                                                                       |            |
| DNA78 | 5'- TATGCAGAGTCATTCGCTCCAGGTAGATTTATGCATCCTCTTG                                                 | For        |
| DNA79 | 5'- CAAGAGGATGCATAAATCTACCTGGAGCGAATGACTCTGCATA                                                 | Rev        |
|       | <b>M3</b>                                                                                       |            |
| DNA80 | 5'- ATATGCAGAGTCATTCGCTCGTGGTAGATTTATGCATCCTCTT                                                 | For        |
| DNA81 | 5'- AAGAGGATGCATAAATCTACCAAGAGCGAATGACTCTGCATAT                                                 | Rev        |
|       | <b>M4</b>                                                                                       |            |
| DNA82 | 5'- ATATGCAGAGTCATTCGCTCGCGGTAGATTTATGCATCCTCTT                                                 | For        |
| DNA83 | 5'- AAGAGGATGCATAAATCTACCGGAGCGAATGACTCTGCATAT                                                  | Rev        |
|       | <b>M5</b>                                                                                       |            |
| DNA84 | 5'- ATATGCAGAGTCATTCGCTCGGGTAGATTTATGCATCCTCTT                                                  | For        |
| DNA85 | 5'- AAGAGGATGCATAAATCTACCCGAGCGAATGACTCTGCATAT                                                  | Rev        |
|       | <b>M6</b>                                                                                       |            |
| DNA86 | 5'- CATATGCAGAGTCATTCGCTCTTGGTAGATTTATGCATCCTCTTG                                               | For        |
| DNA87 | 5'- CAAGAGGATGCATAAATCTACCAAGAGCGAATGACTCTGCATATG                                               | Rev        |
|       | <b>M7</b>                                                                                       |            |
| DNA88 | 5'- CATATGCAGAGTCATTCGCTCTCGGTAGATTTATGCATCCTCTTG                                               | For        |
| DNA89 | 5'- CAAGAGGATGCATAAATCTACCGAGAGCGAATGACTCTGCATATG                                               | Rev        |
|       | <b>M8</b>                                                                                       |            |
| DNA90 | 5'- CATATGCAGAGTCATTCGCTCTGCGTAGATTTATGCATCCTCTTG                                               | For        |
| DNA91 | 5'- CAAGAGGATGCATAAATCTACGCAAGAGCGAATGACTCTGCATATG                                              | Rev        |
|       | <b>M9; M14</b>                                                                                  |            |
| DNA92 | 5'- TTTCACTCTTTTGGTGTGTAGAGTTCTTTTACTTGCTATGTGG                                                 | For        |
| DNA93 | 5'- CCACATAGCAAGTAAAAGAATCTCTACACACCAAAGAGTGAAA                                                 | Rev        |

|               |  |                                                     |     |
|---------------|--|-----------------------------------------------------|-----|
|               |  | <b>M10</b>                                          |     |
| <b>DNA94</b>  |  | 5' - TTTCACTCTTTTGGTGTGTAGAGCTCTTTTACTTGCTATGTGG    | For |
| <b>DNA95</b>  |  | 5' - CCACATAGCAAGTAAAAGA GCTCTACACACCAAAAAGAGTGAAA  | Rev |
|               |  | <b>M11</b>                                          |     |
| <b>DNA96</b>  |  | 5' - GTTTTCACTCTTTTGGTGTGTAGGTATCTTTTACTTGCTATGTGG  | For |
| <b>DNA97</b>  |  | 5' - CCACATAGCAAGTAAAAGATACCTACACACCAAAAAGAGTGAAAAC | Rev |
|               |  | <b>M12</b>                                          |     |
| <b>DNA98</b>  |  | 5' - GTTTTCACTCTTTTGGTGTGTAGCCATCTTTTACTTGCTATGTGG  | For |
| <b>DNA99</b>  |  | 5' - CCACATAGCAAGTAAAAGATGGCTACACACCAAAAAGAGTGAAAAC | Rev |
|               |  | <b>M15; M17</b>                                     |     |
| <b>DNA100</b> |  | 5' - GTTTTCACTCTTTTGGTGTGTAGCTATCTTTTACTTGCTATGTGG  | For |
| <b>DNA101</b> |  | 5' - CCACATAGCAAGTAAAAGATAGCTACACACCAAAAAGAGTGAAAAC | Rev |
